# Supplementary material
Source: bioRxiv or medRxiv preprint supplement (https://medrxiv.org/highwire/filestream/74590/field_highwire_adjunct_files/2/2020.03.27.20045534-3.pdf)

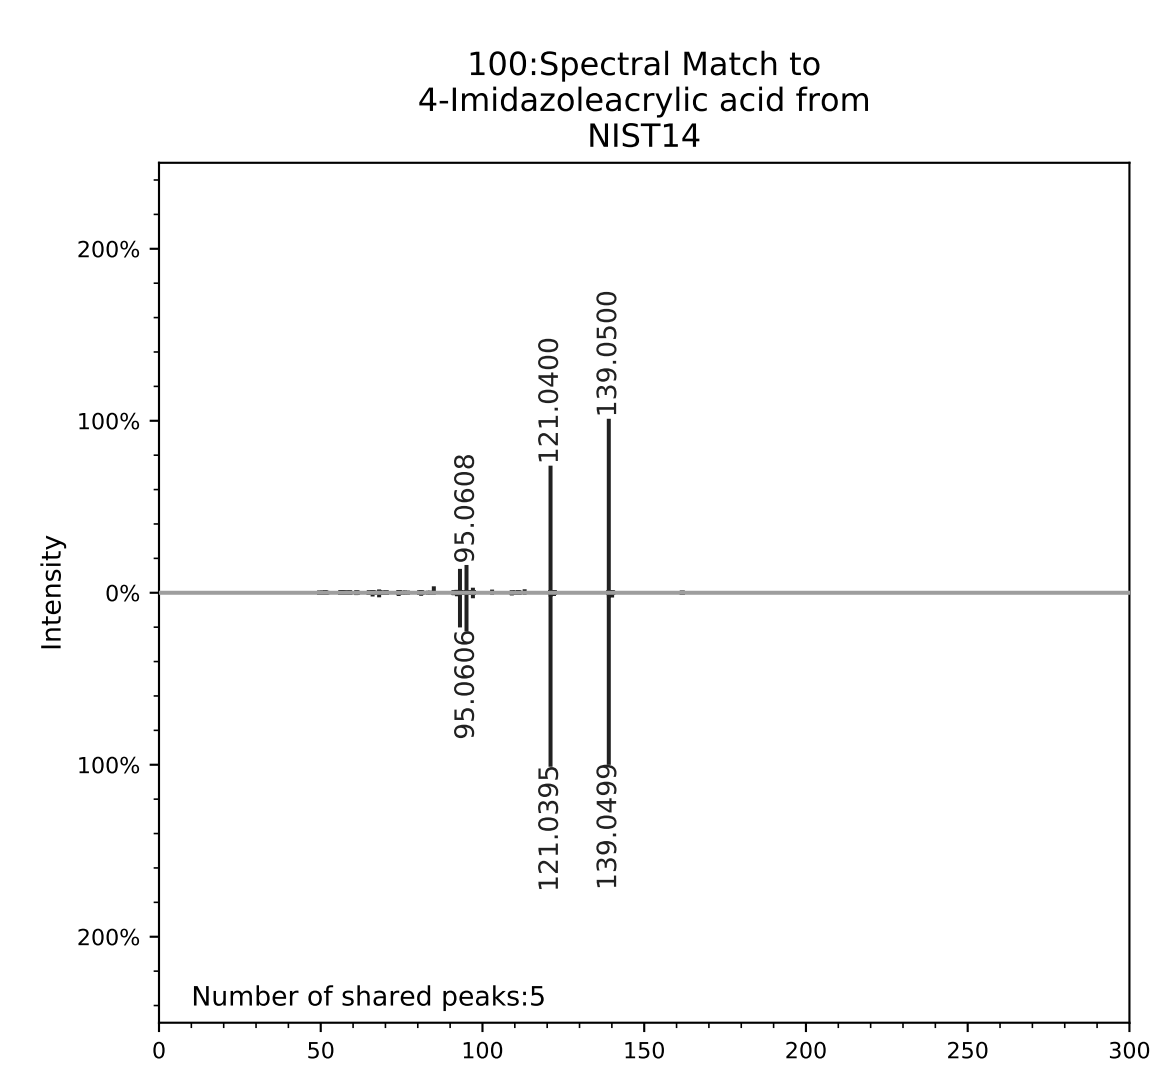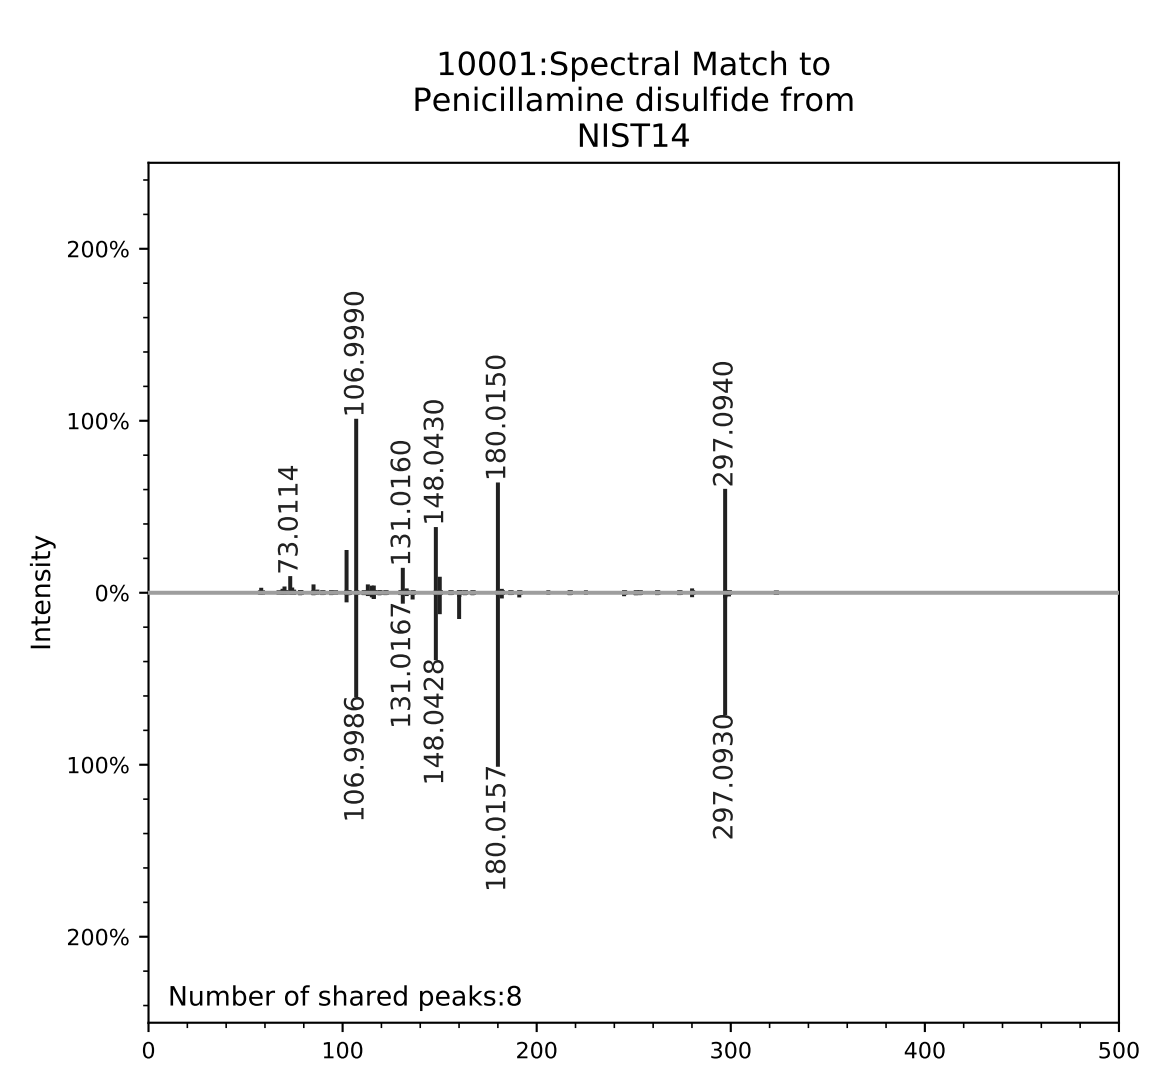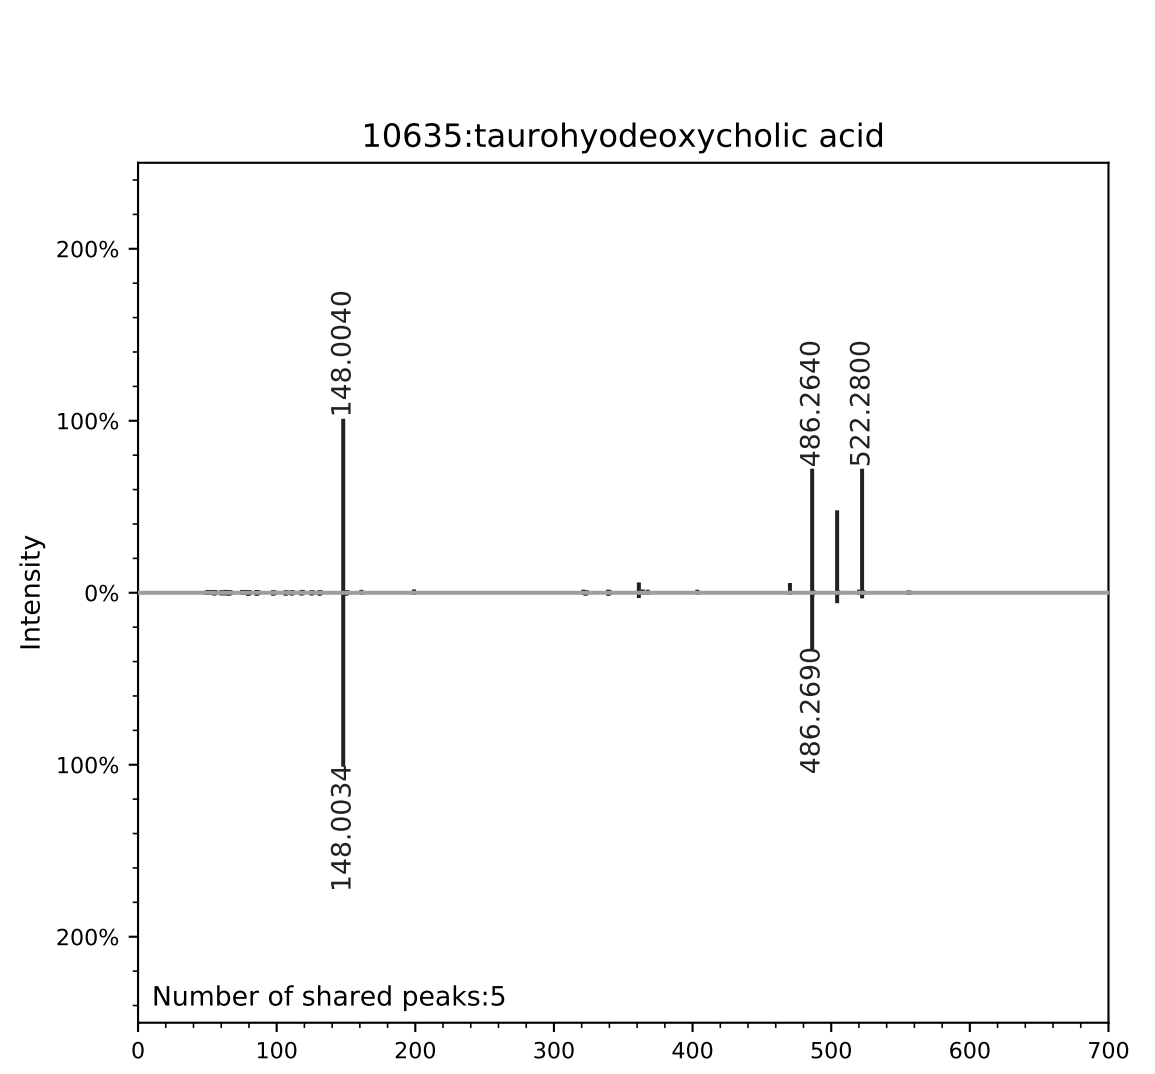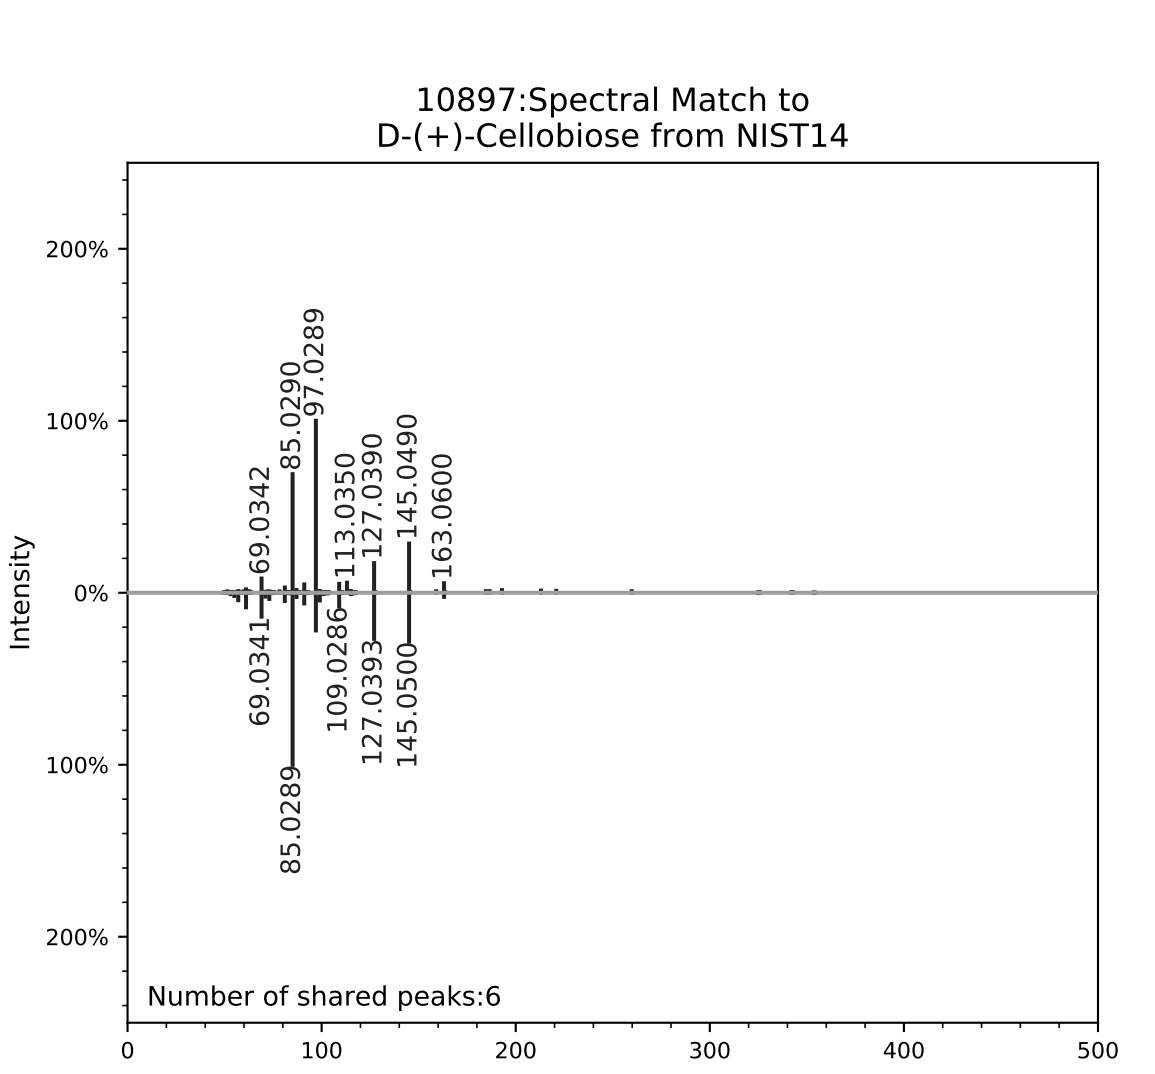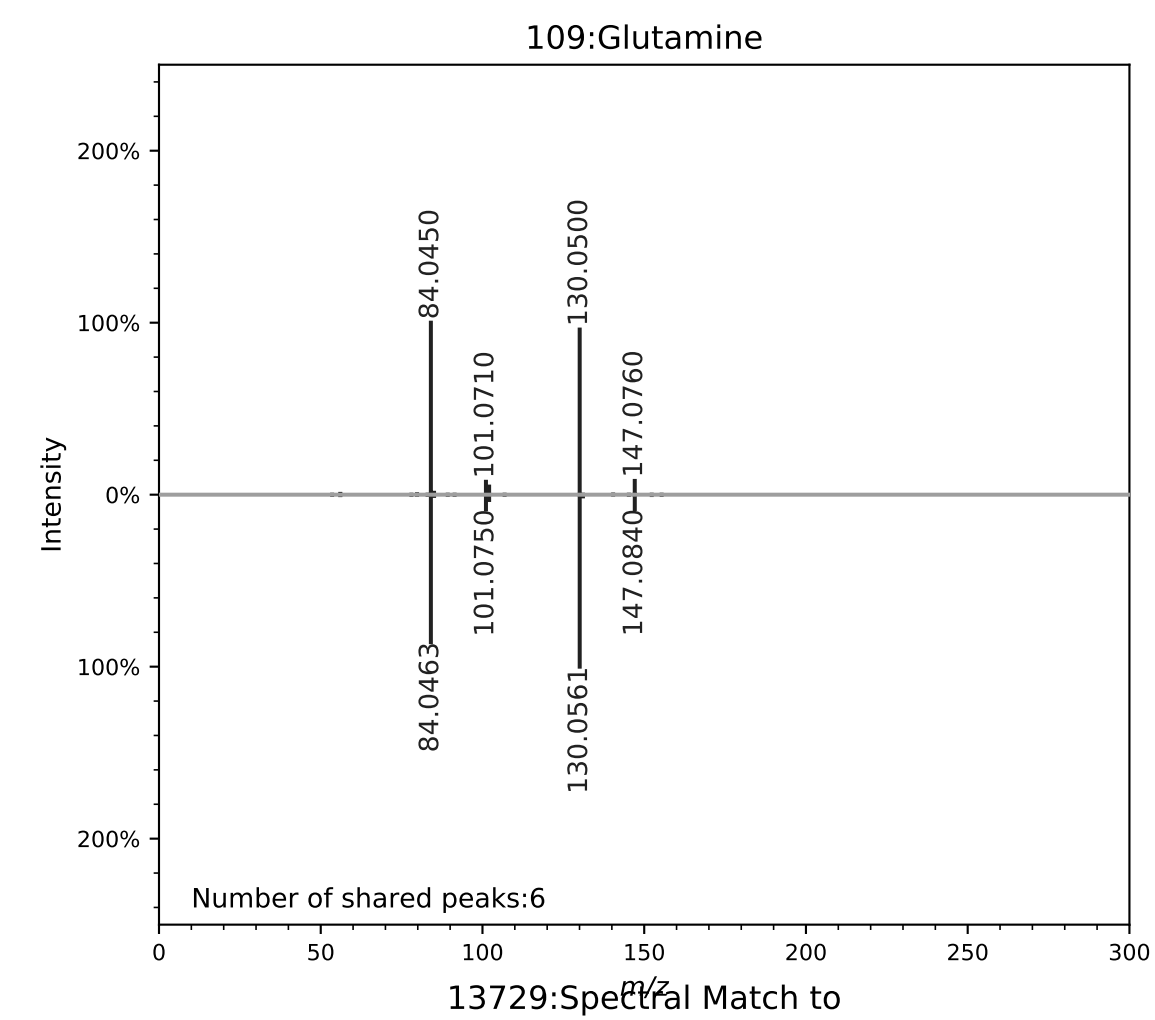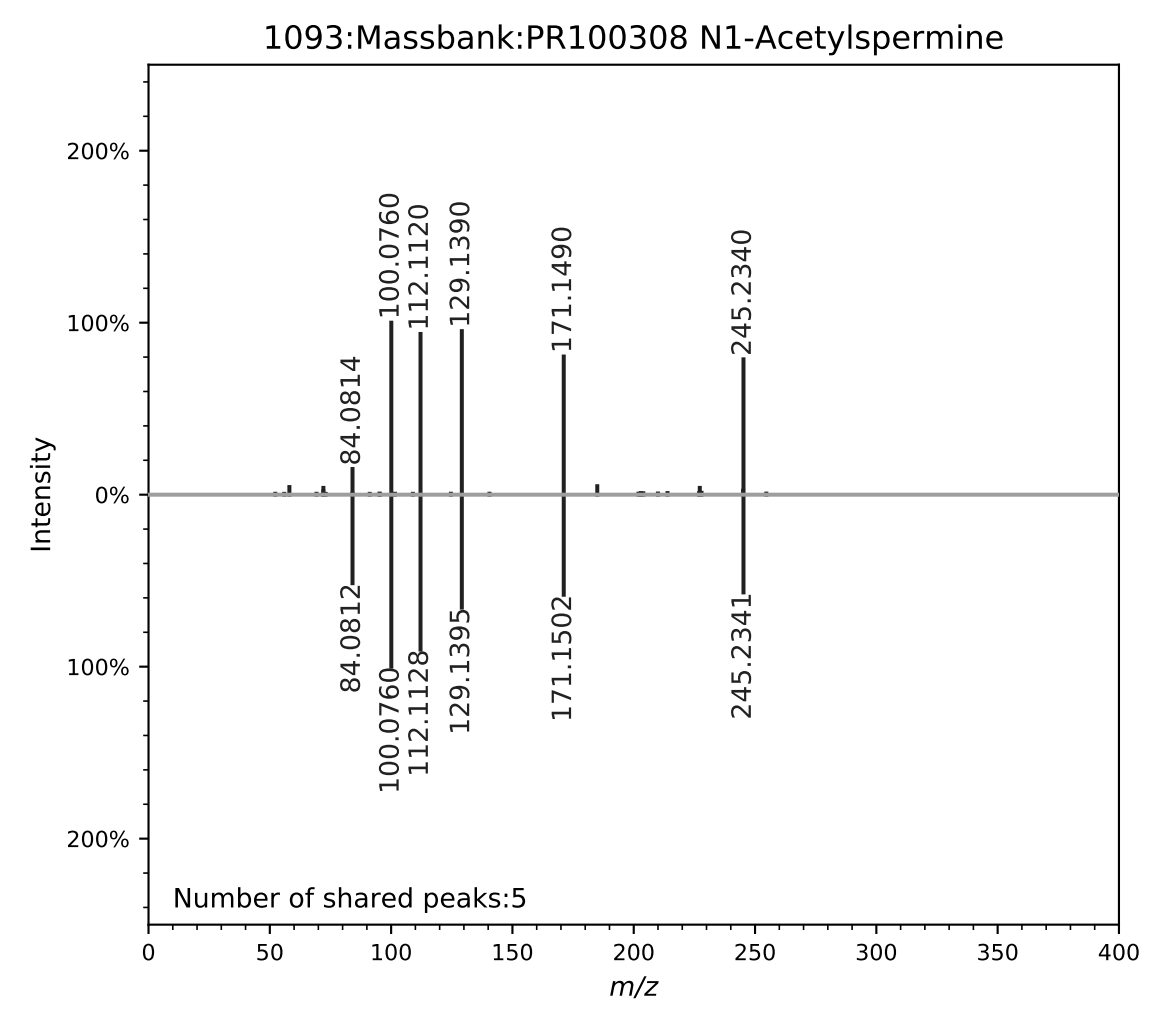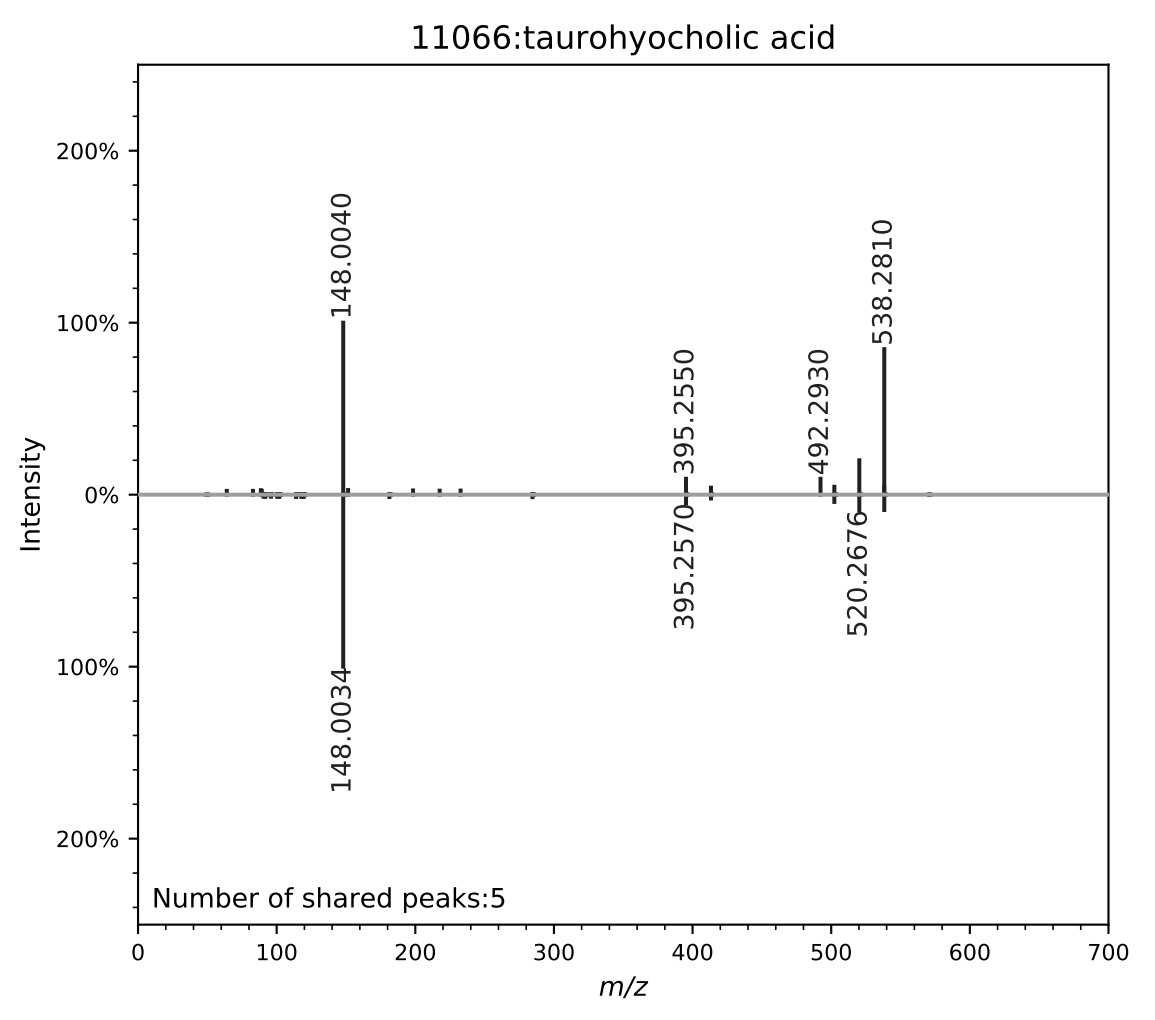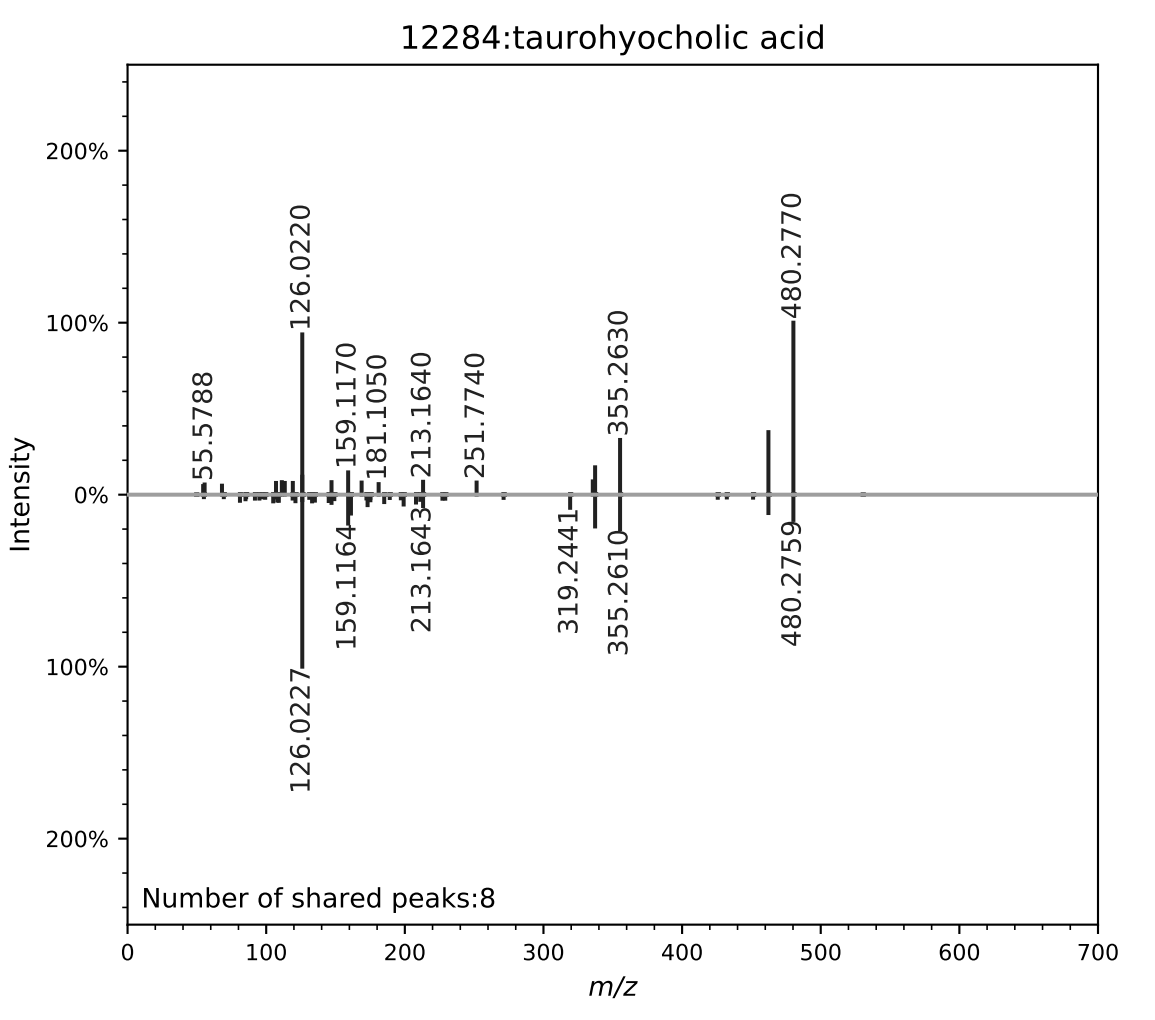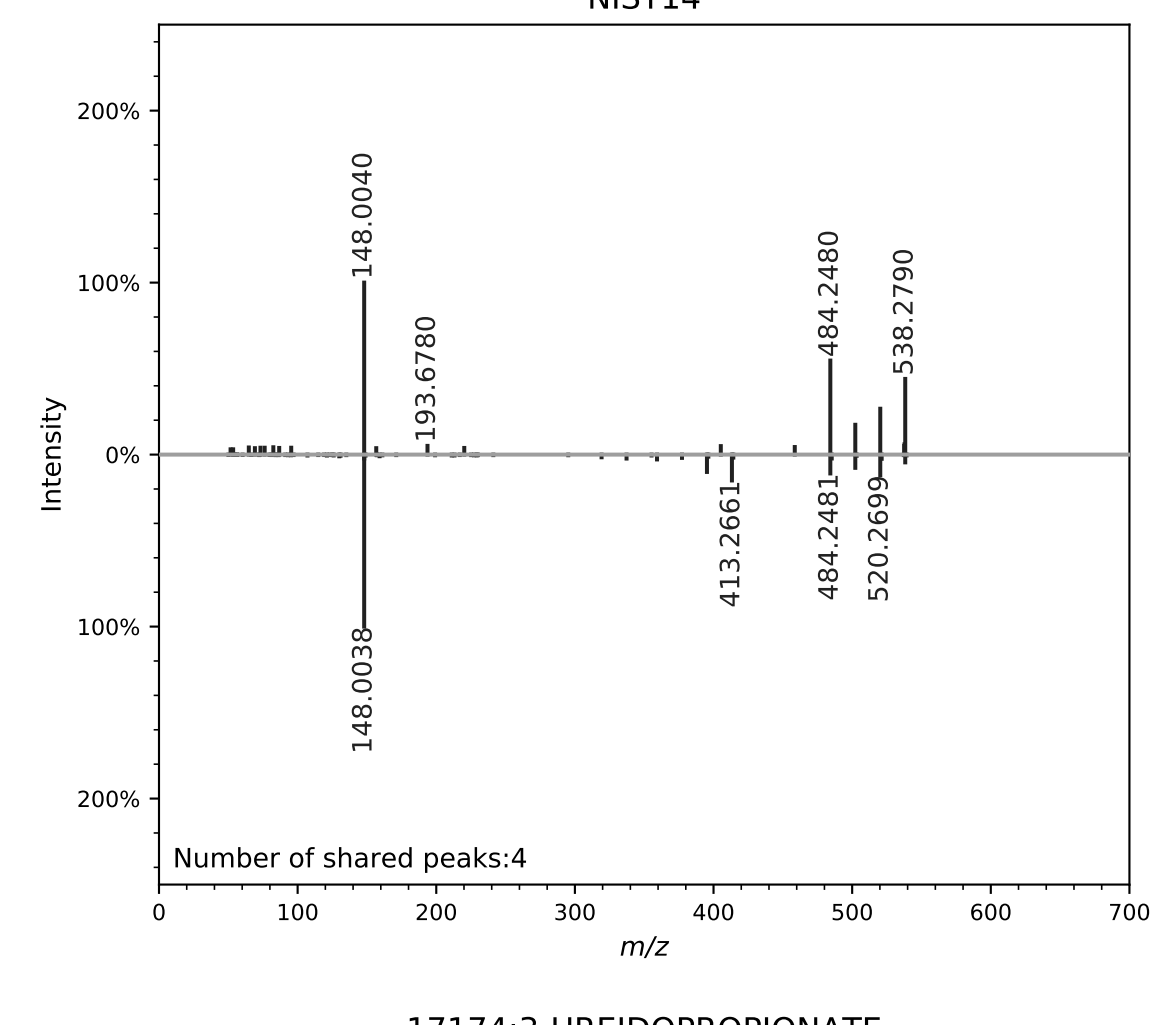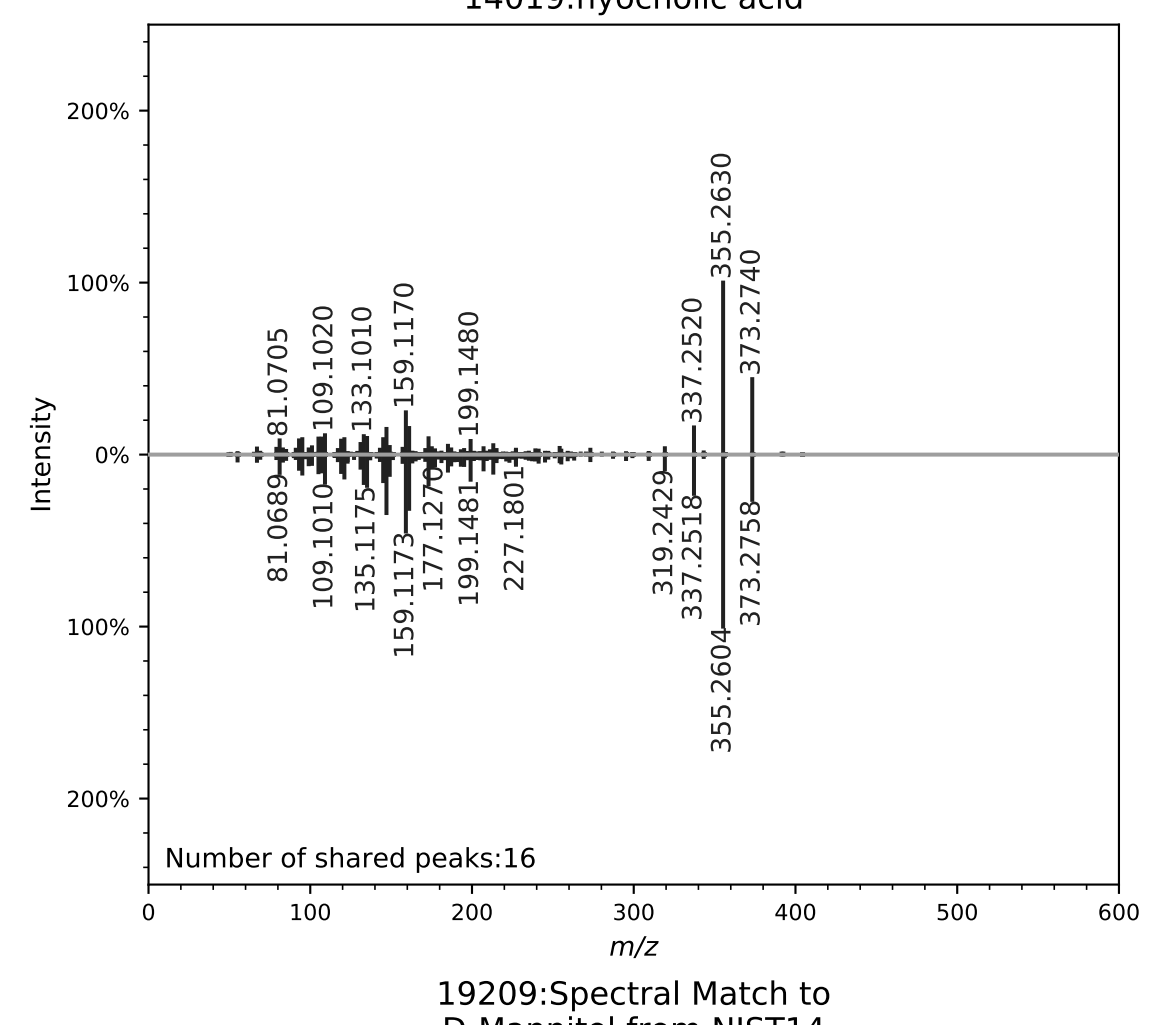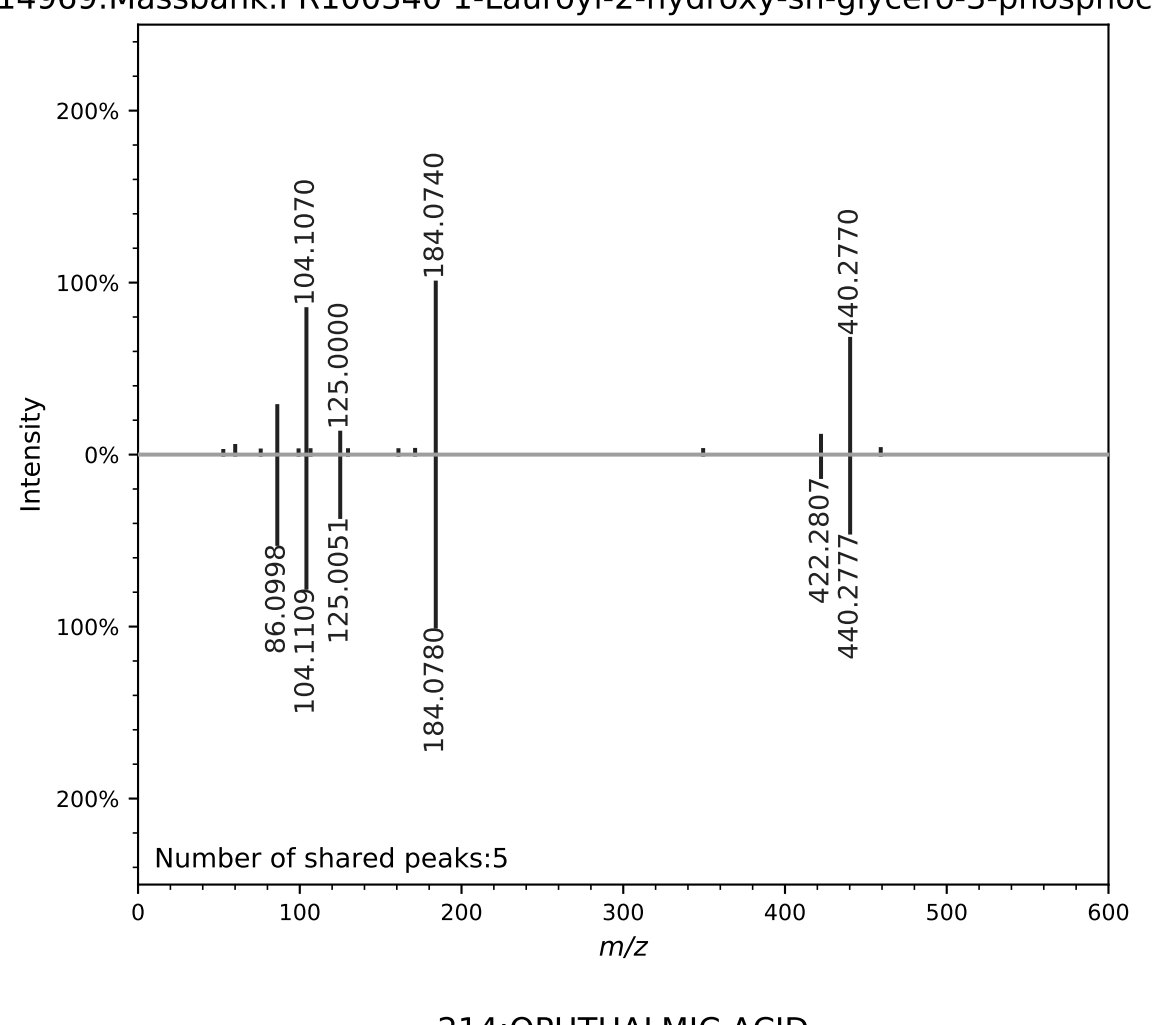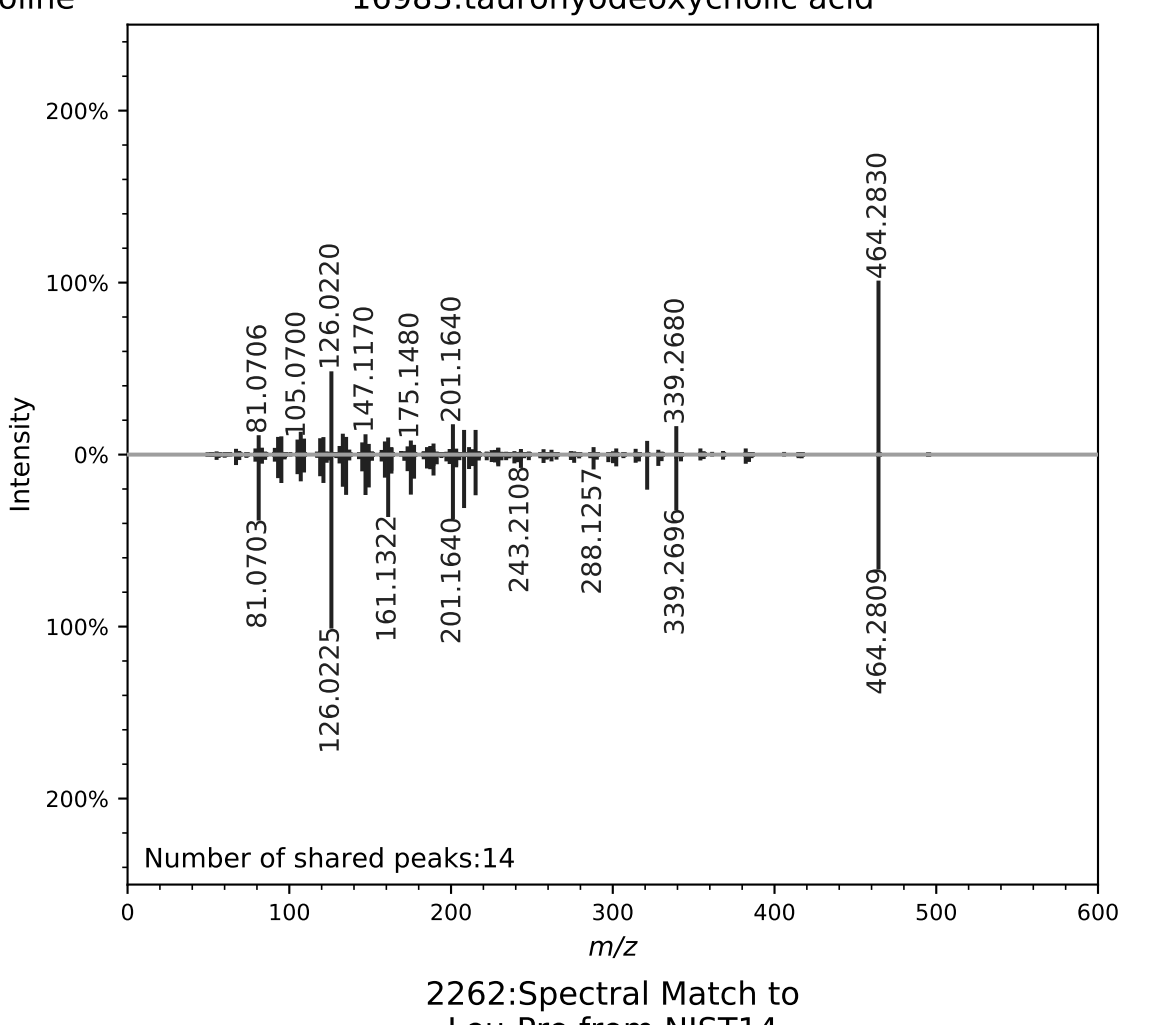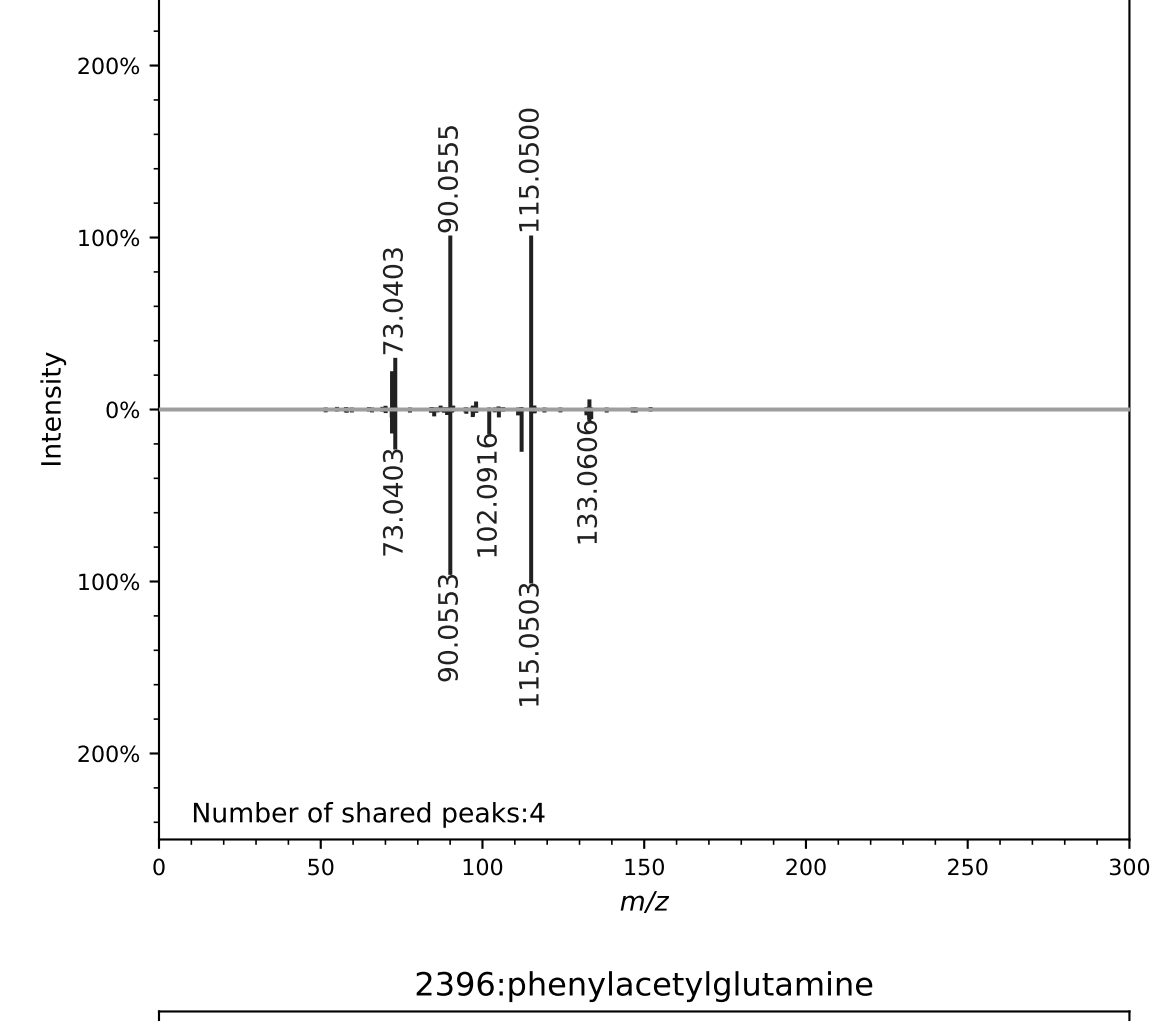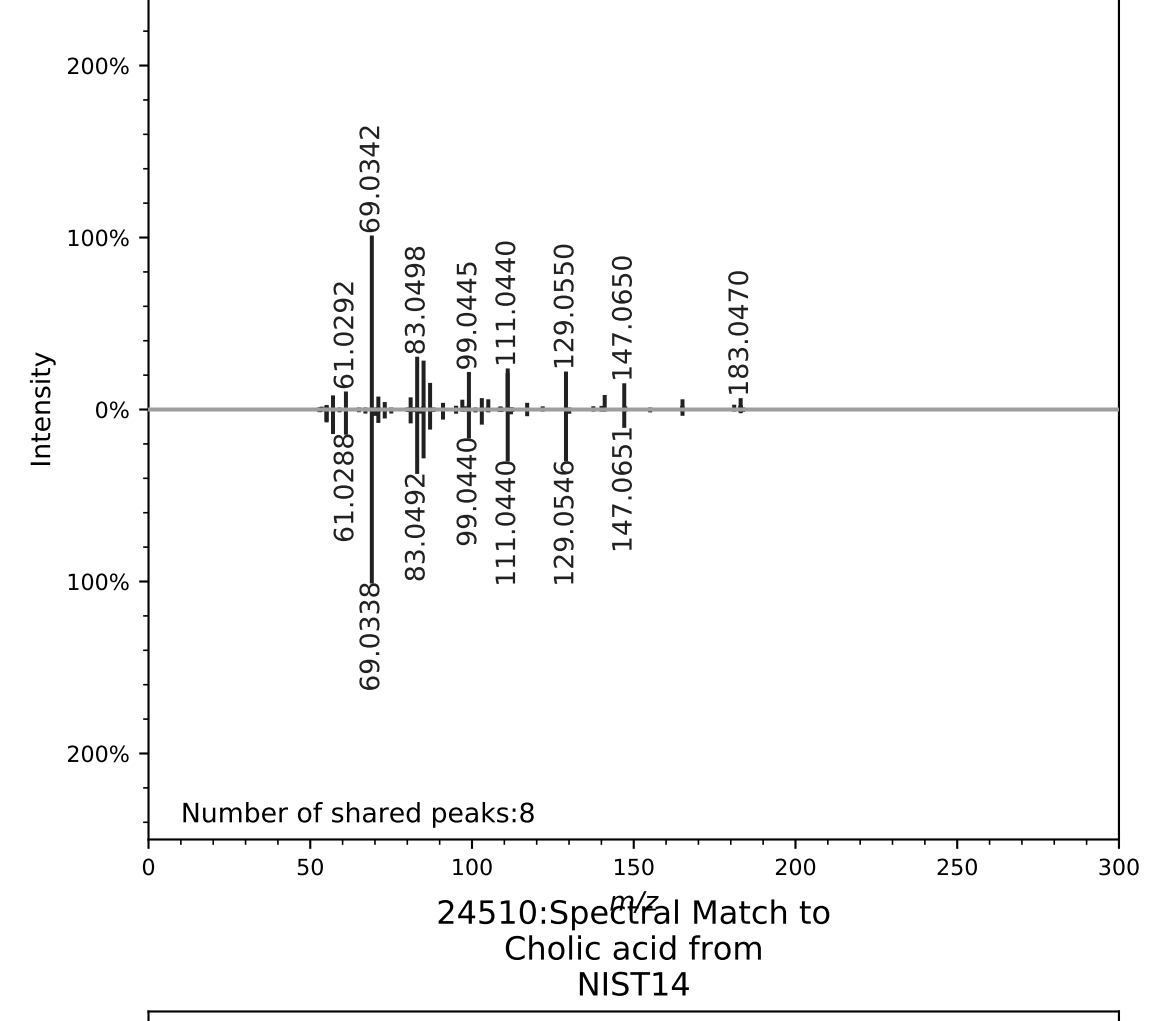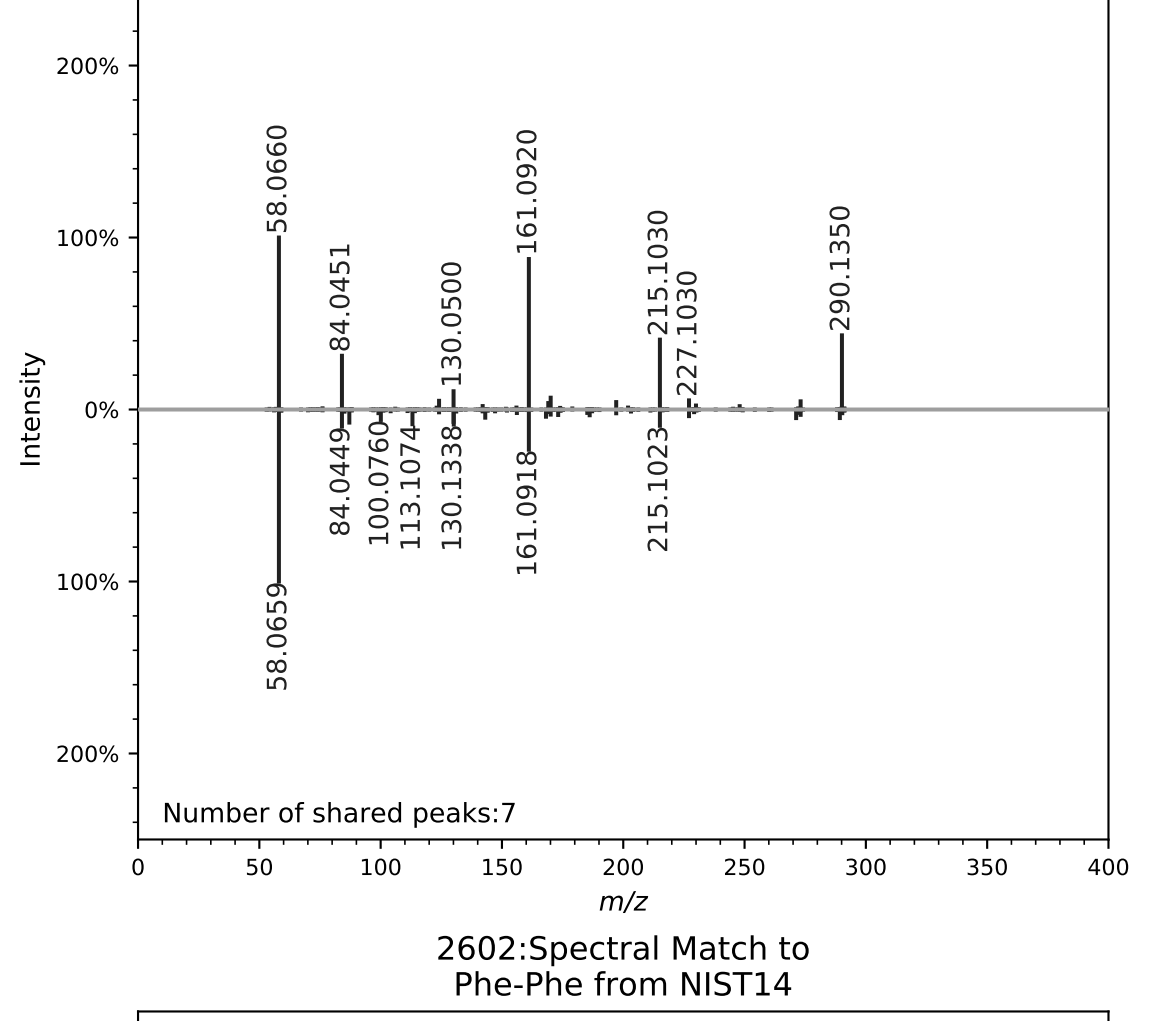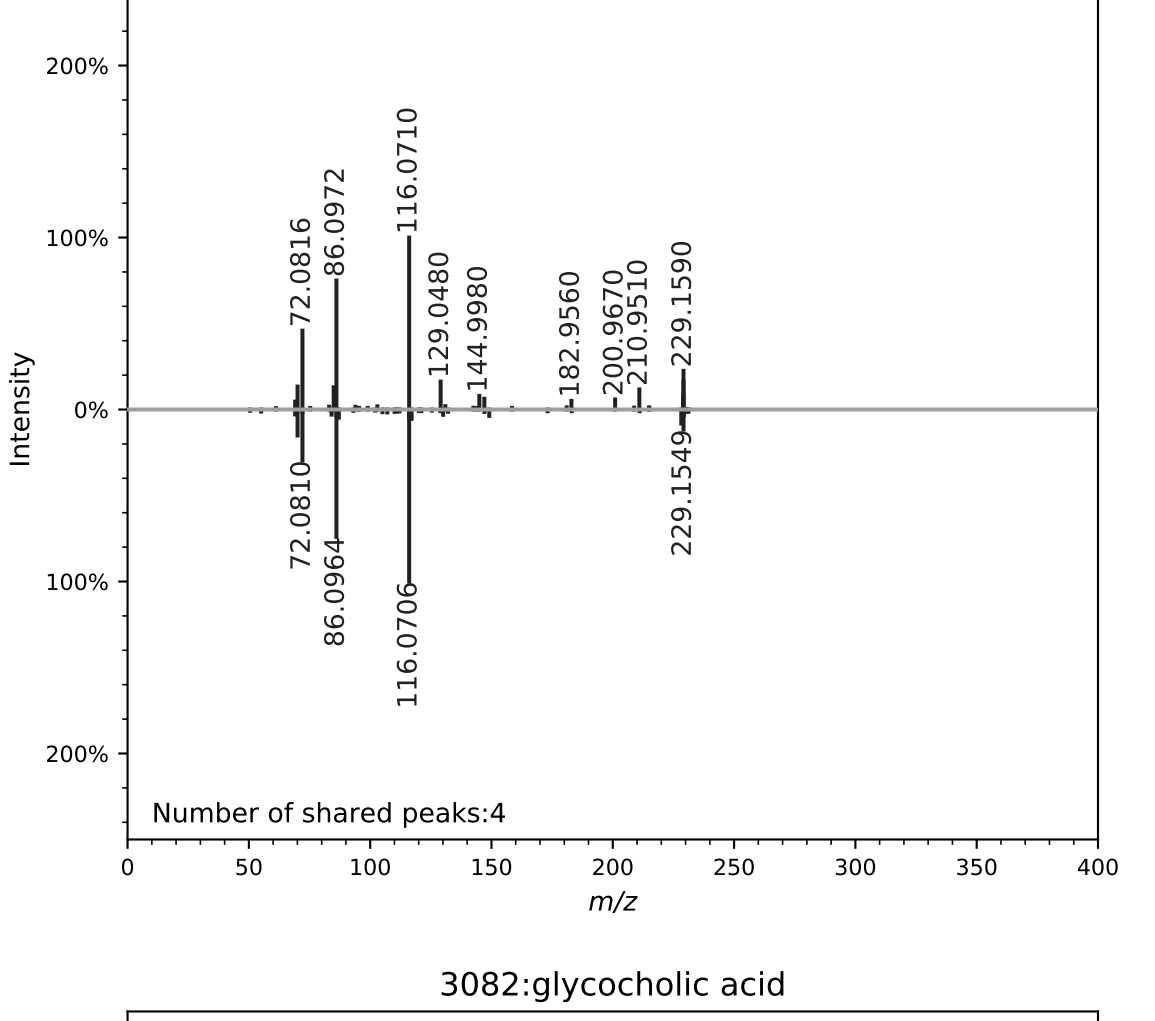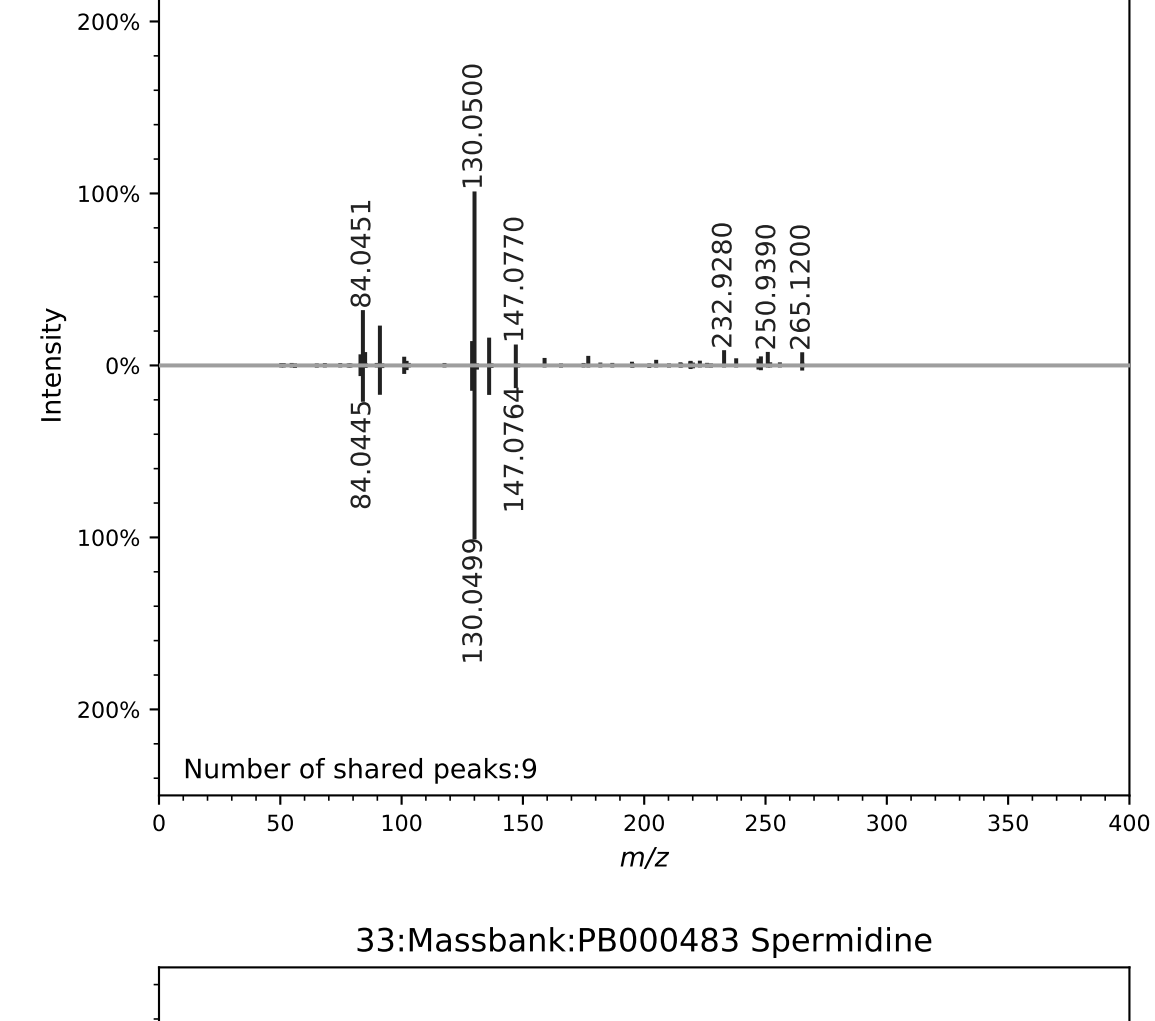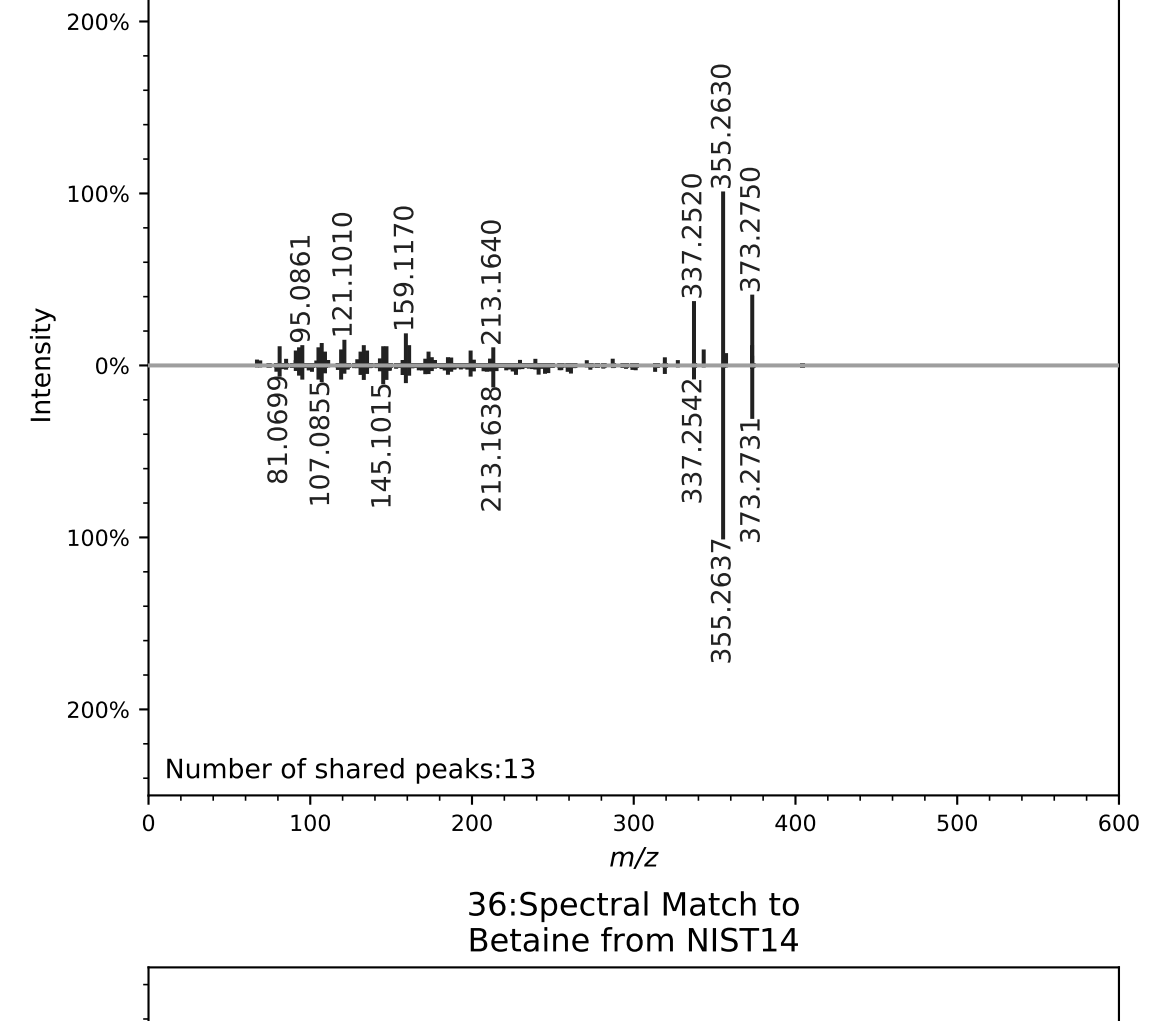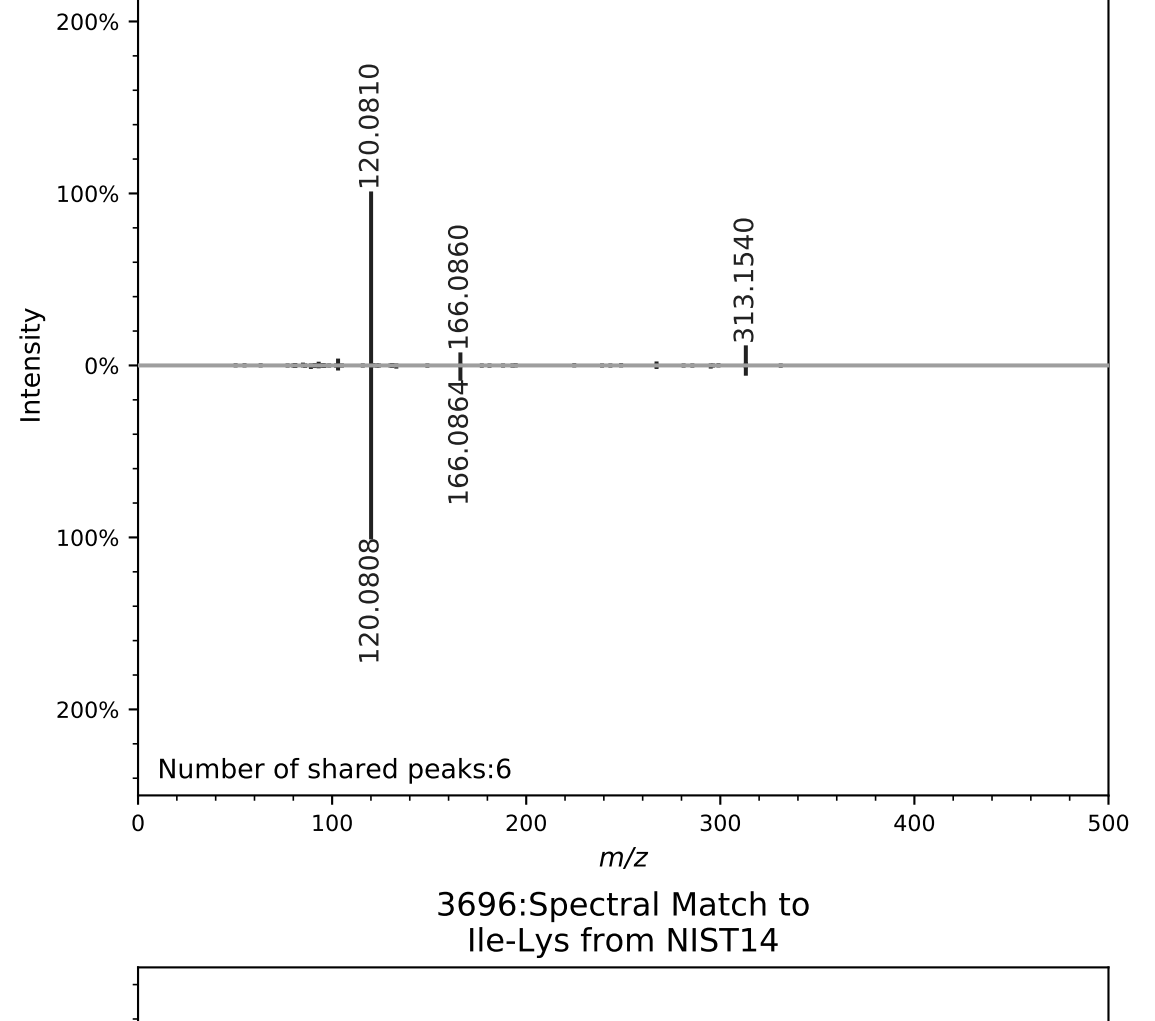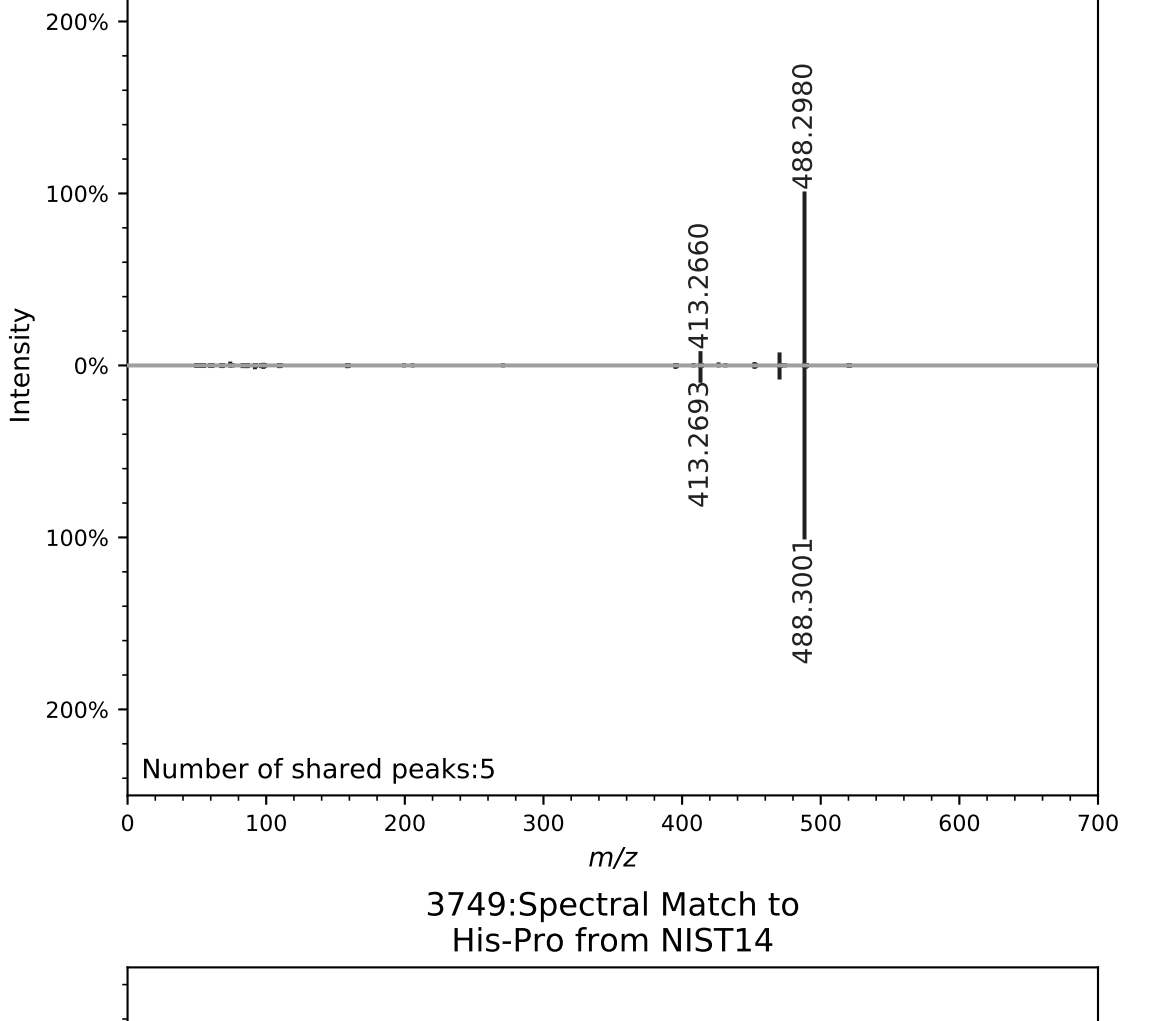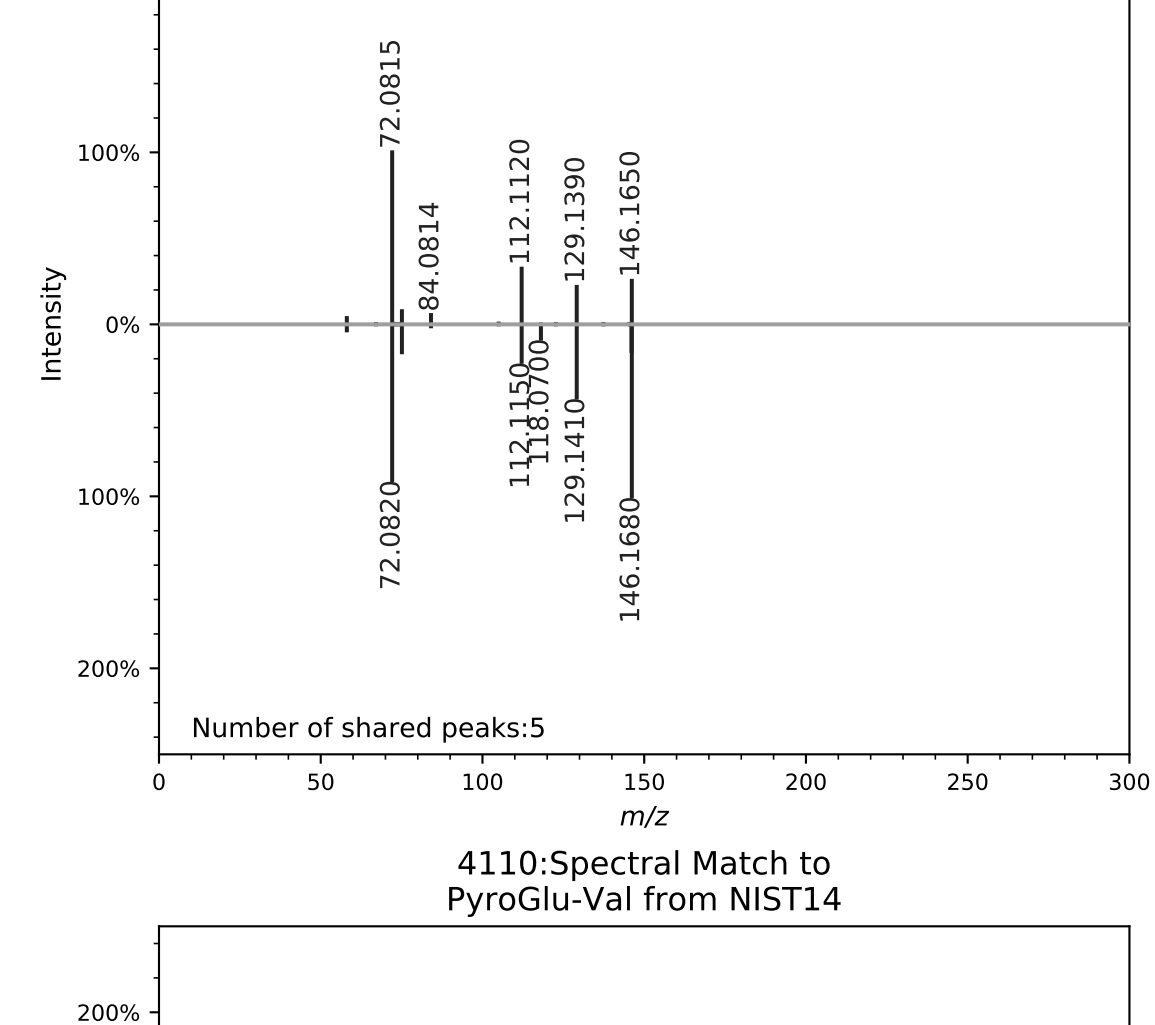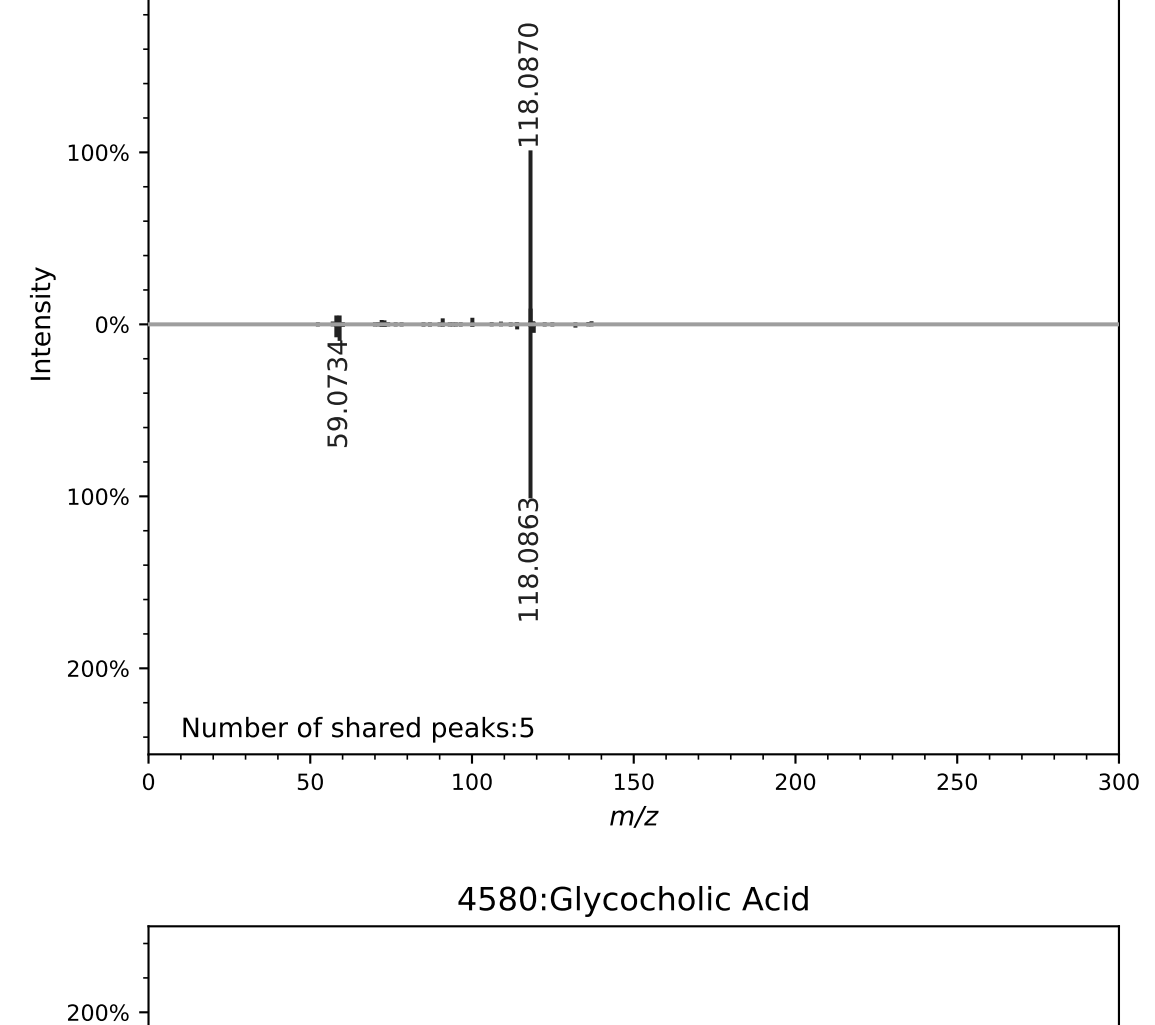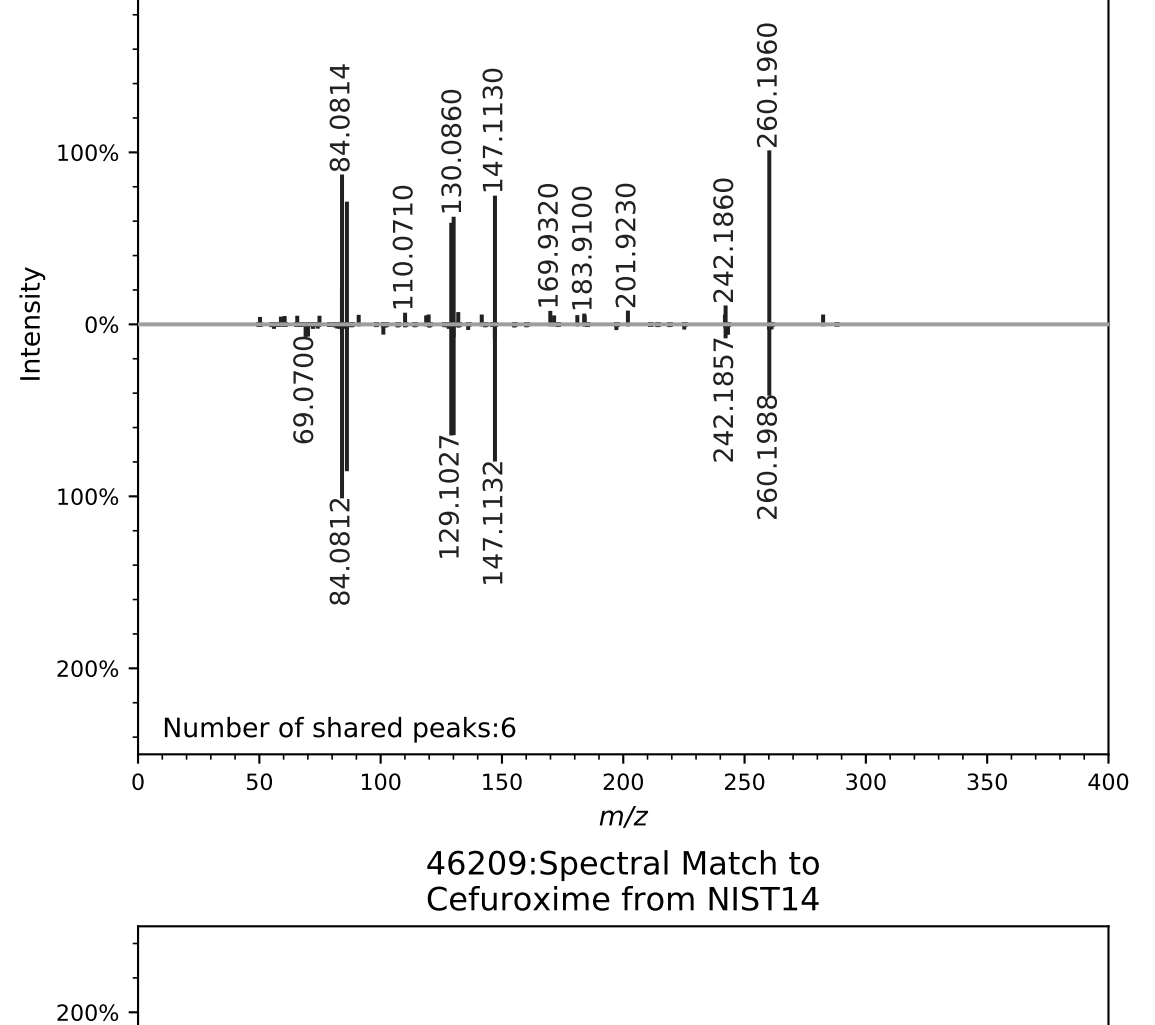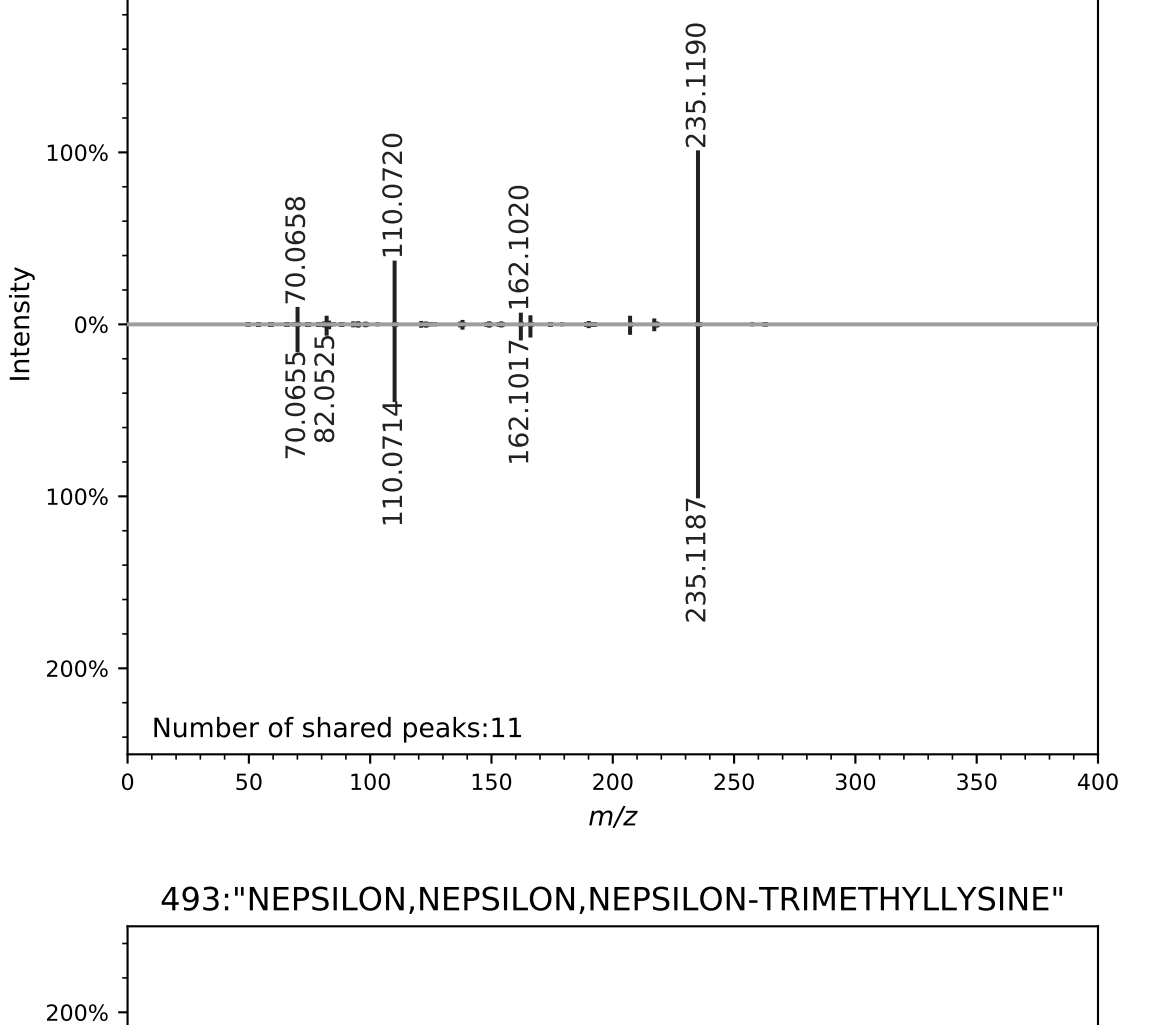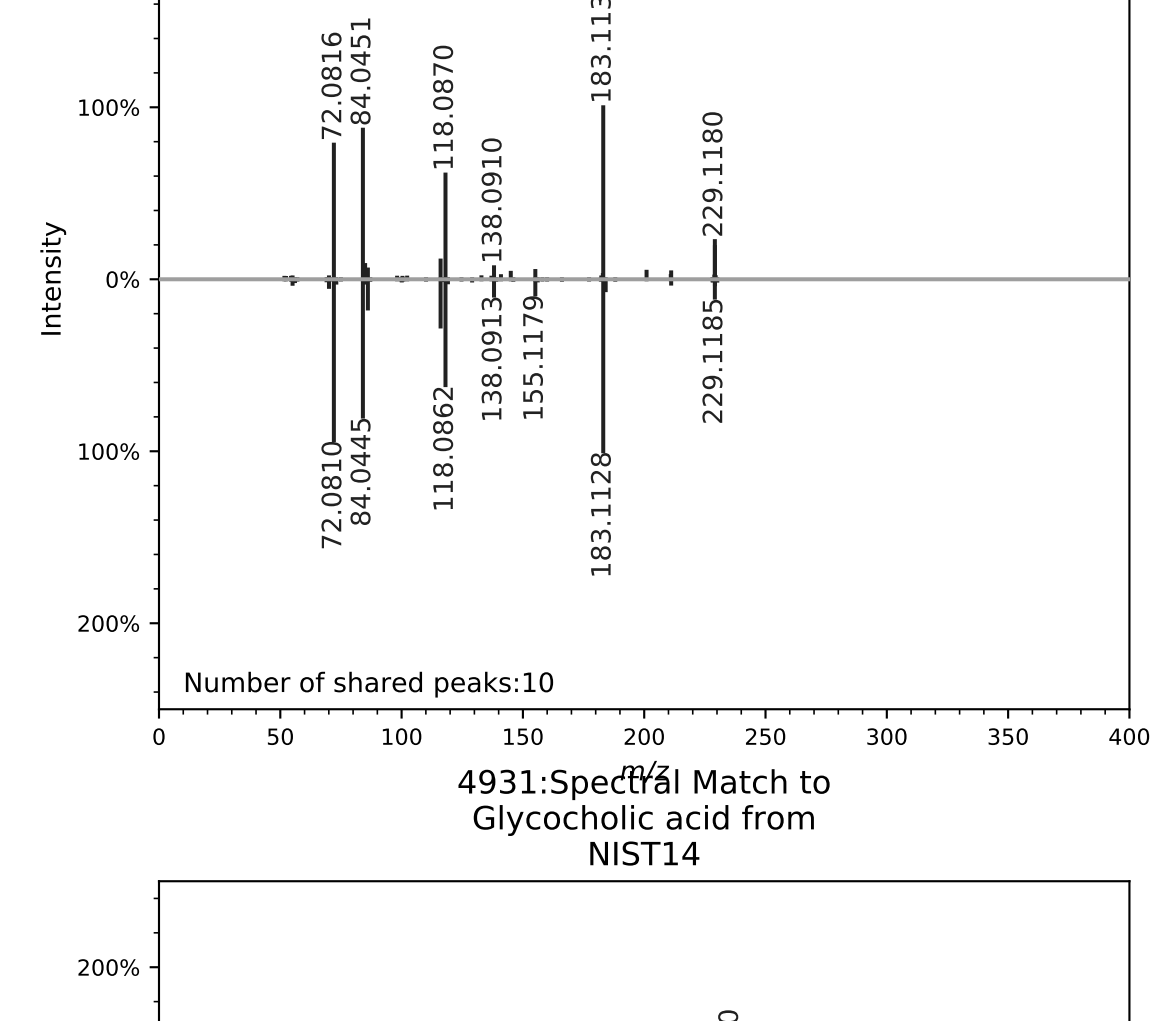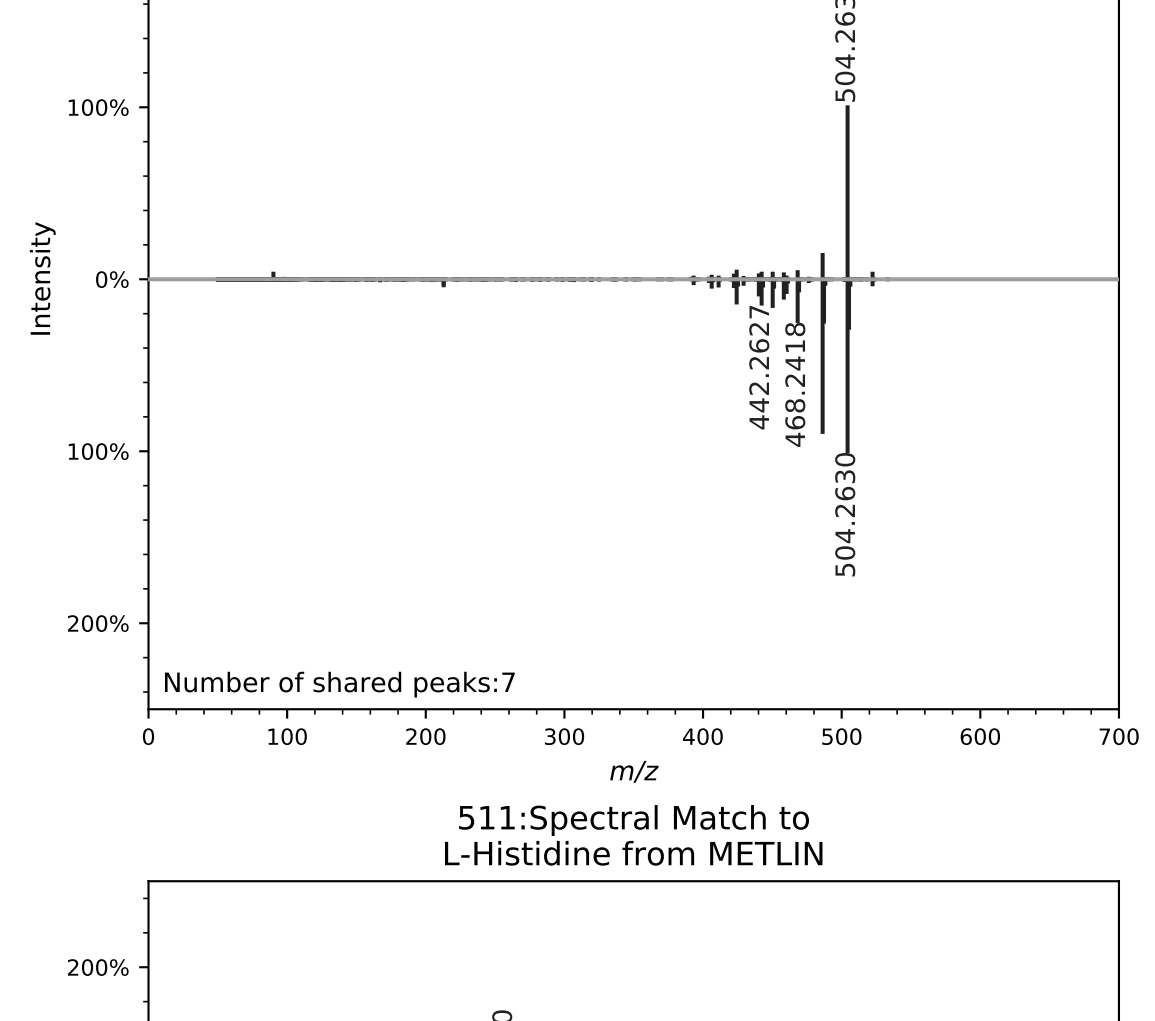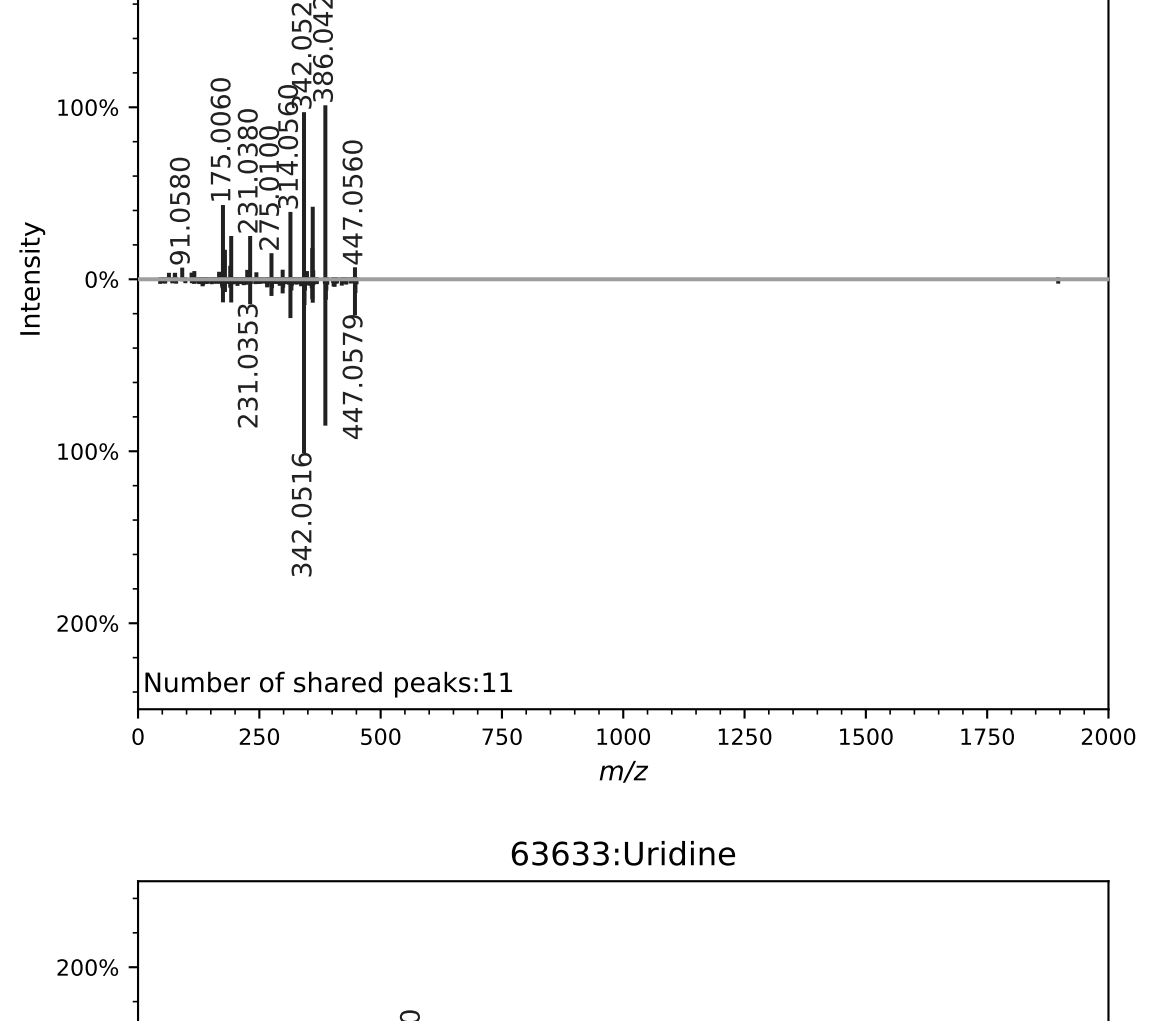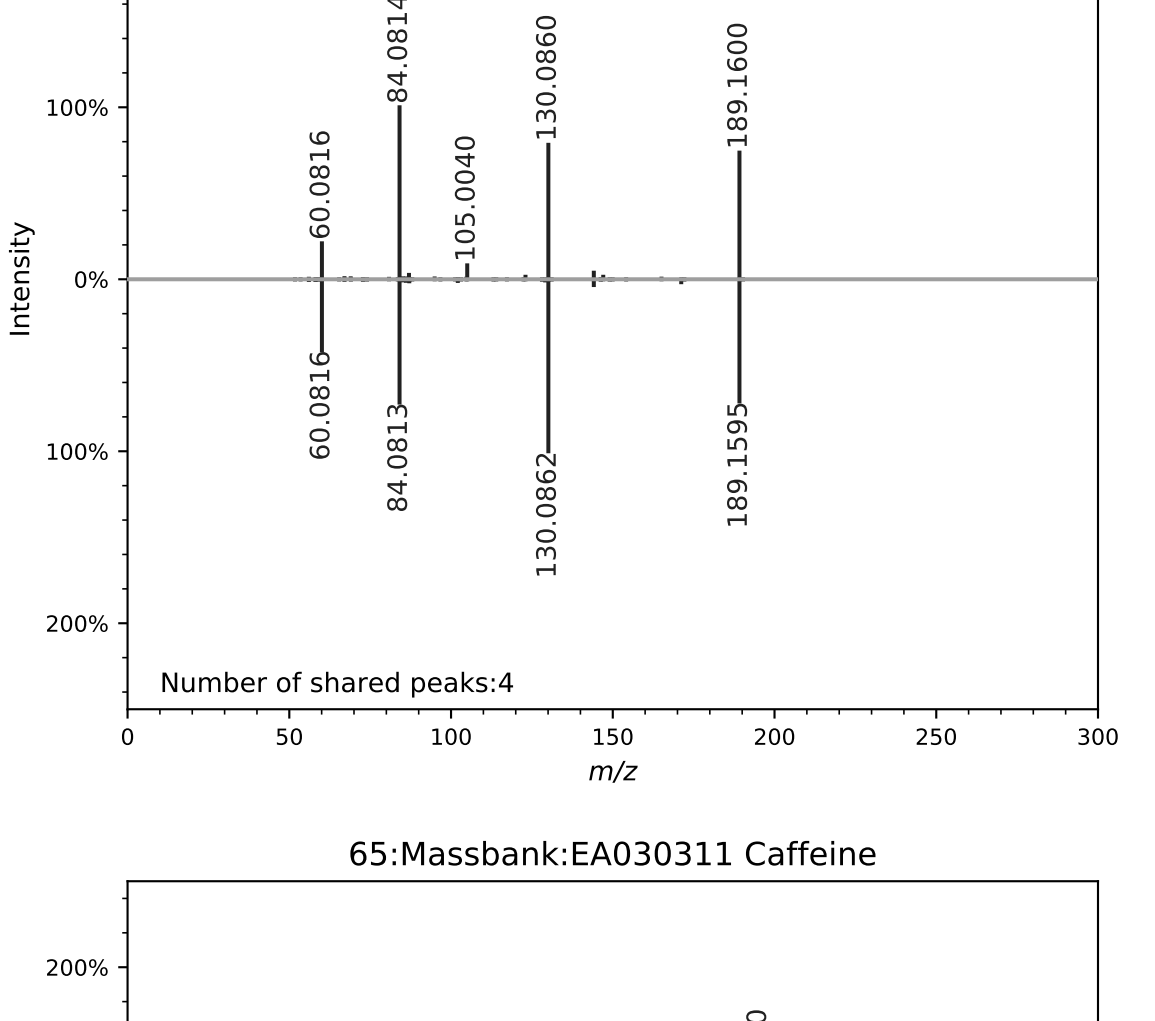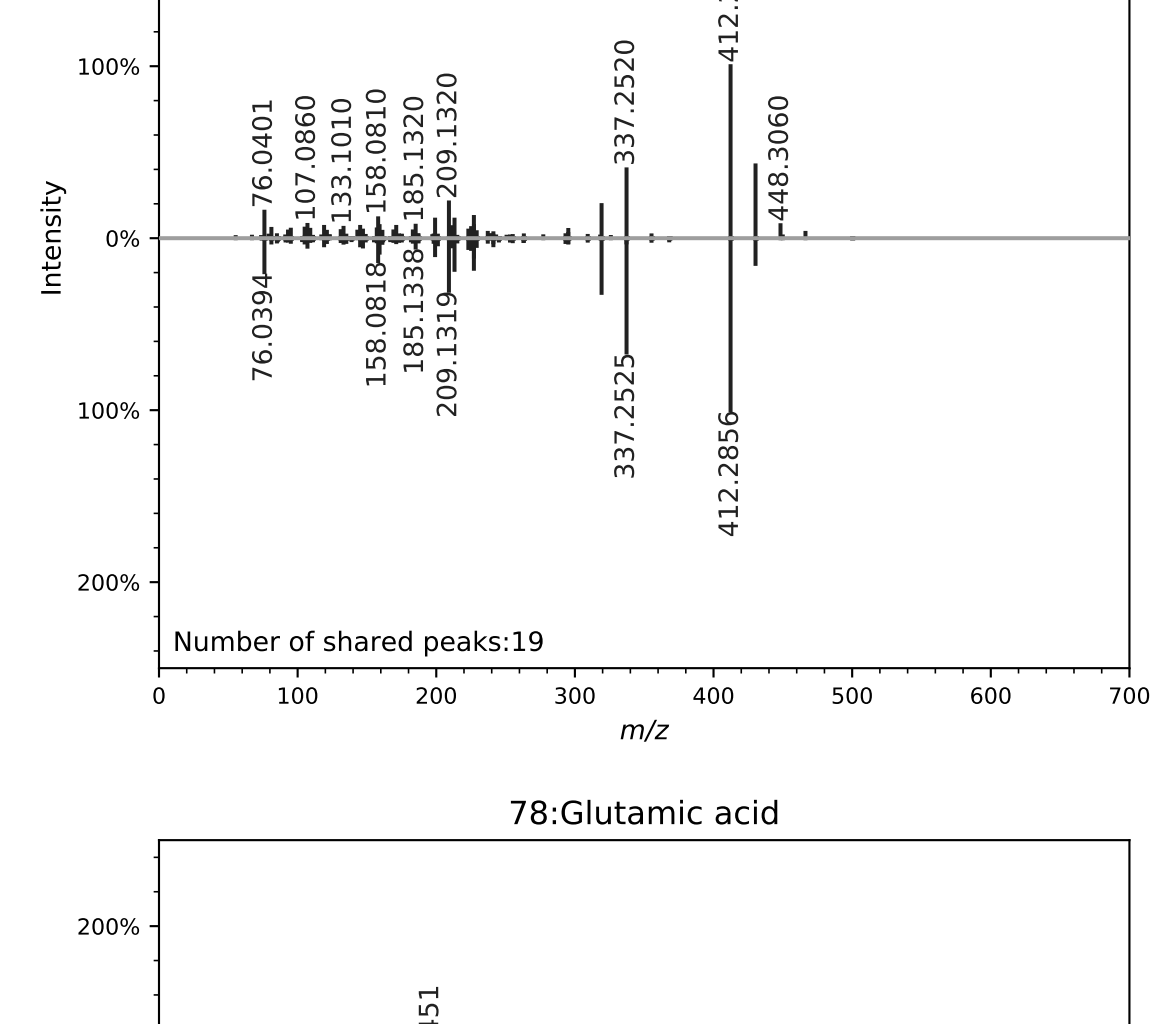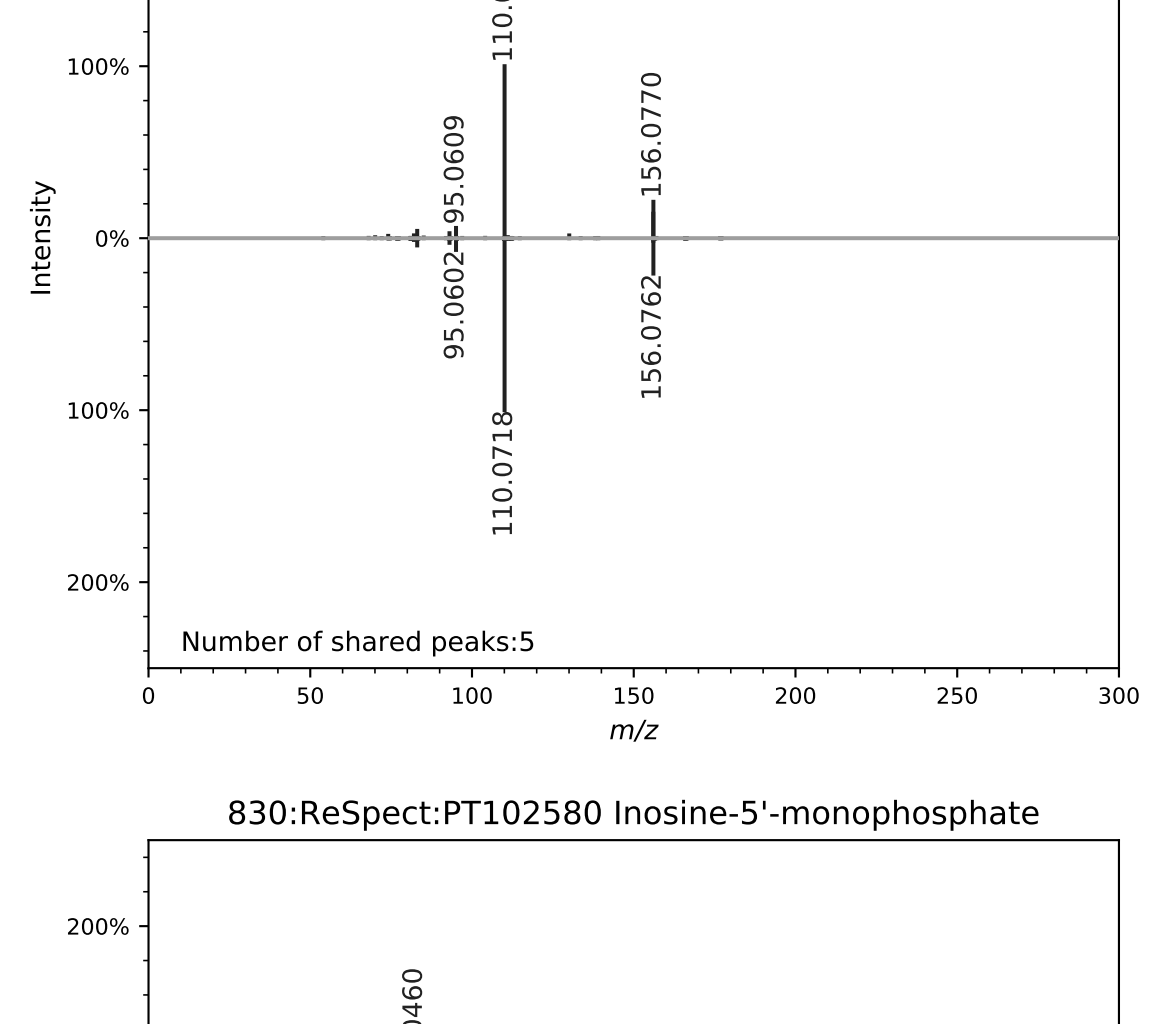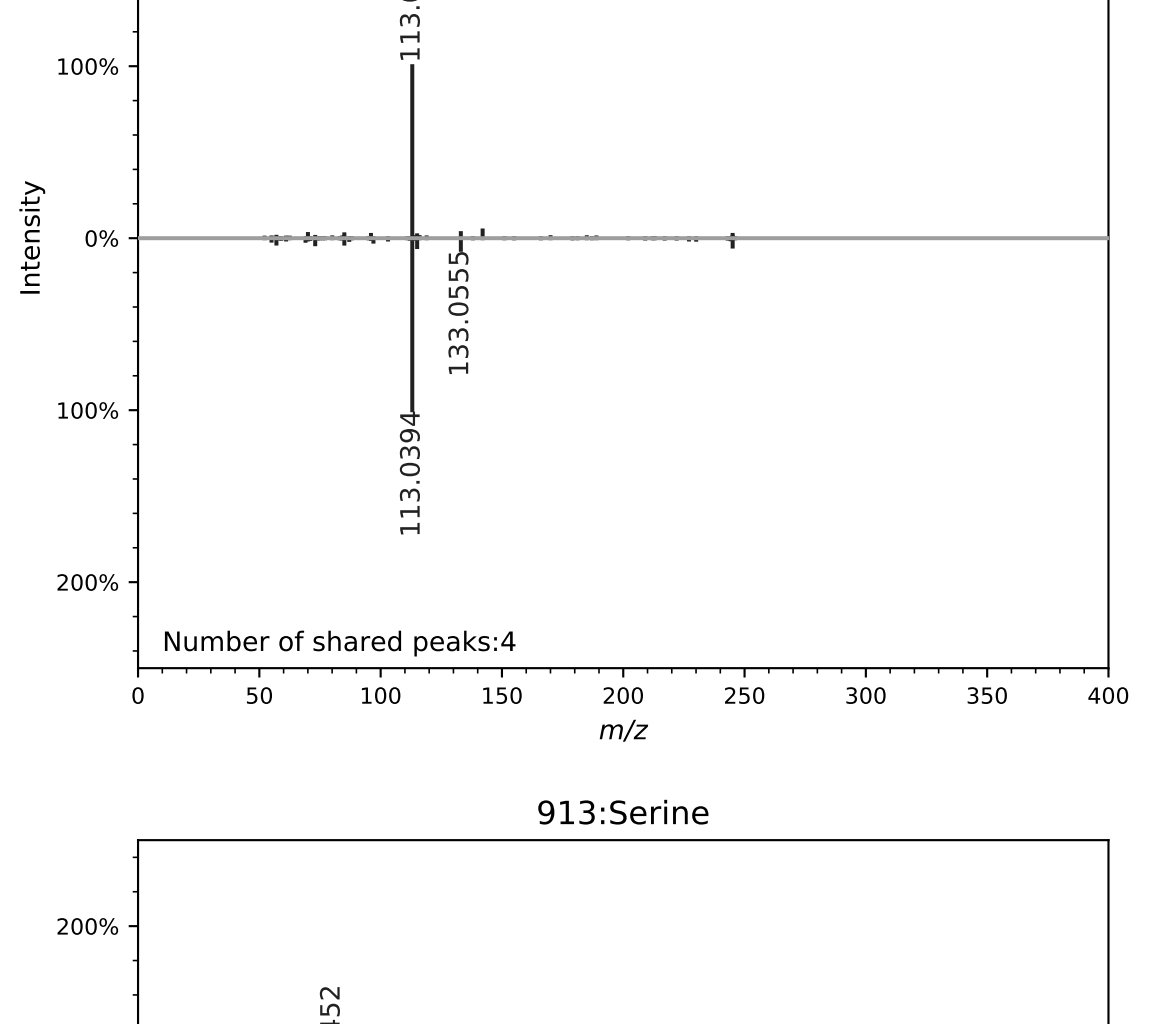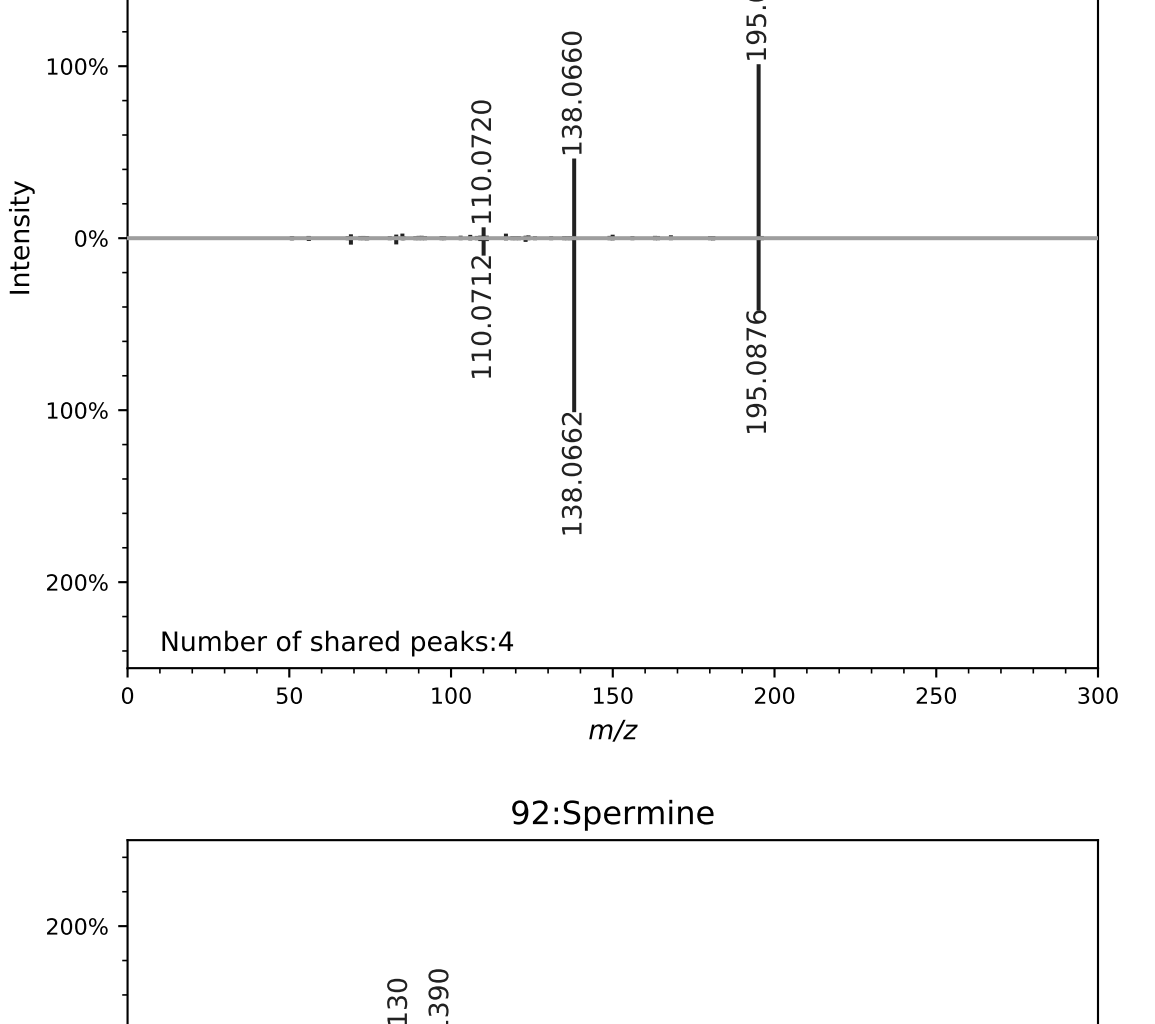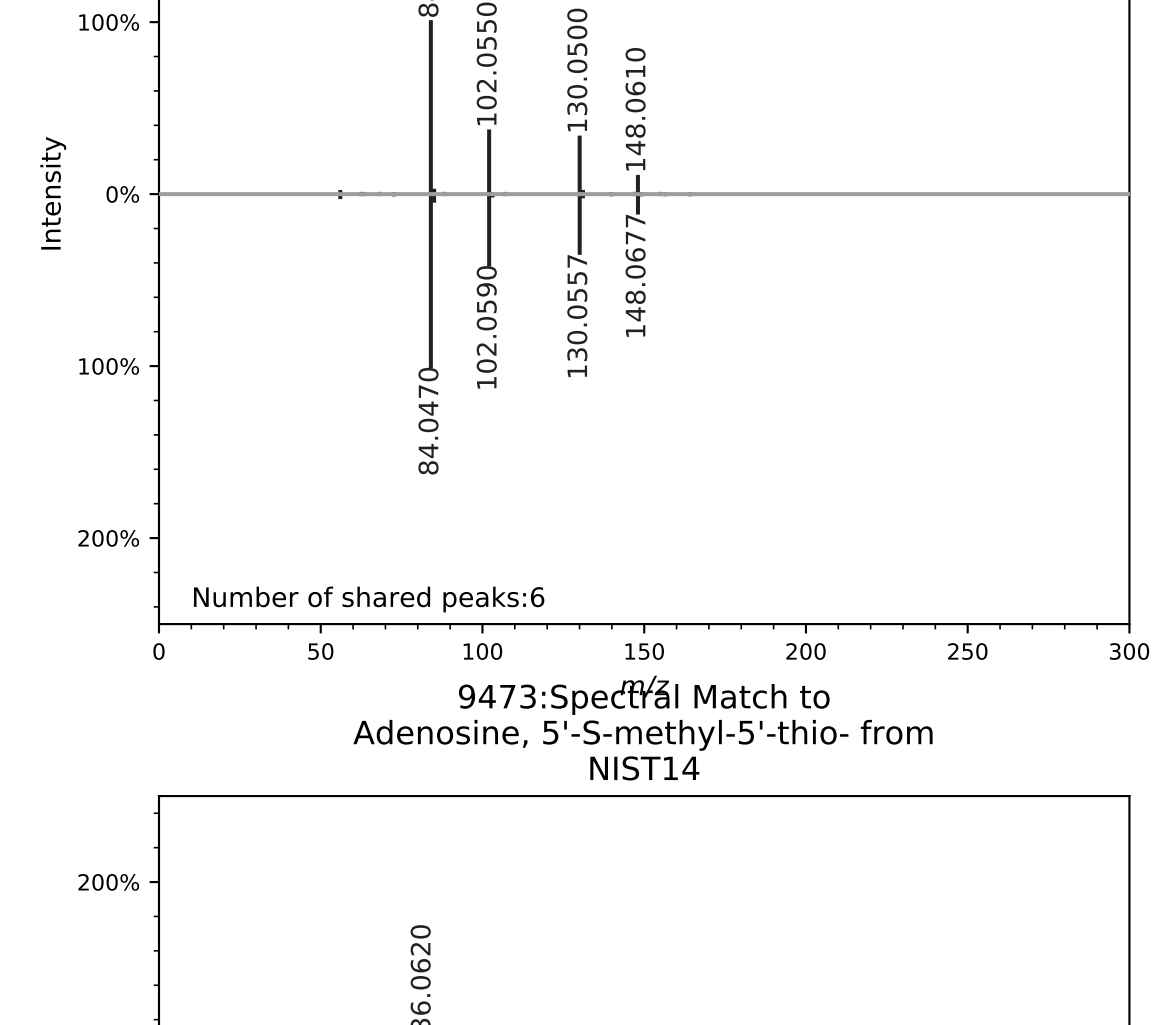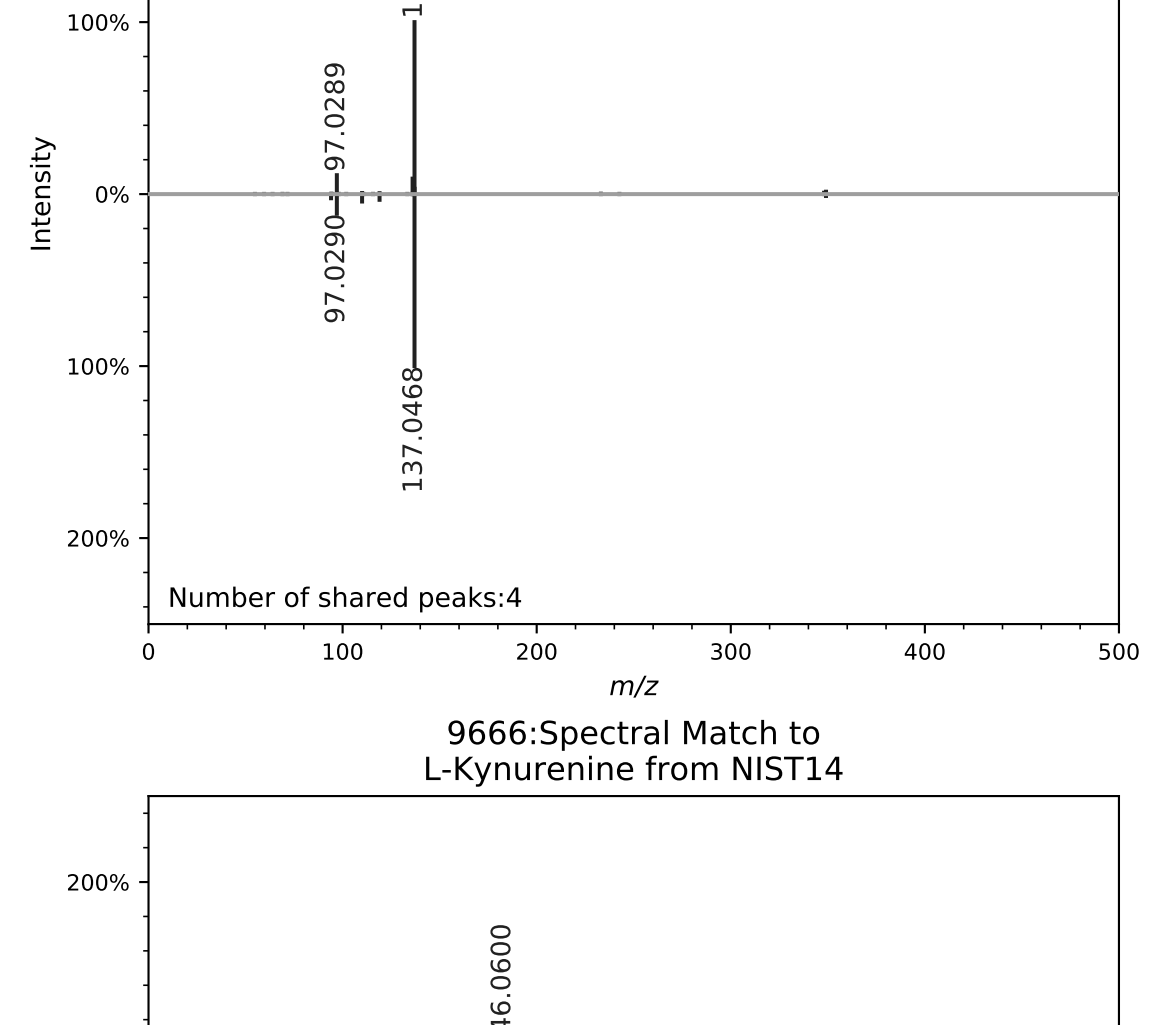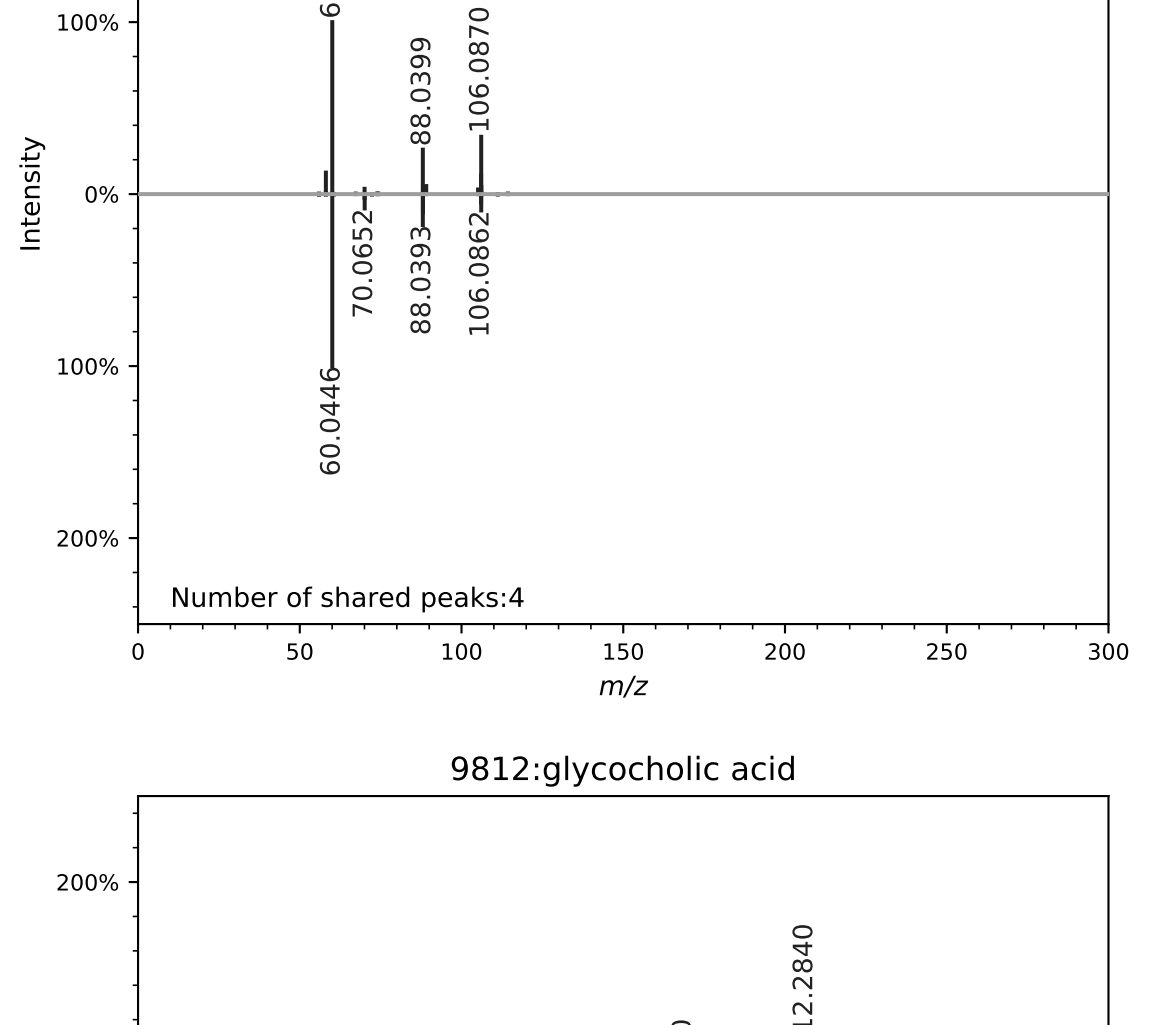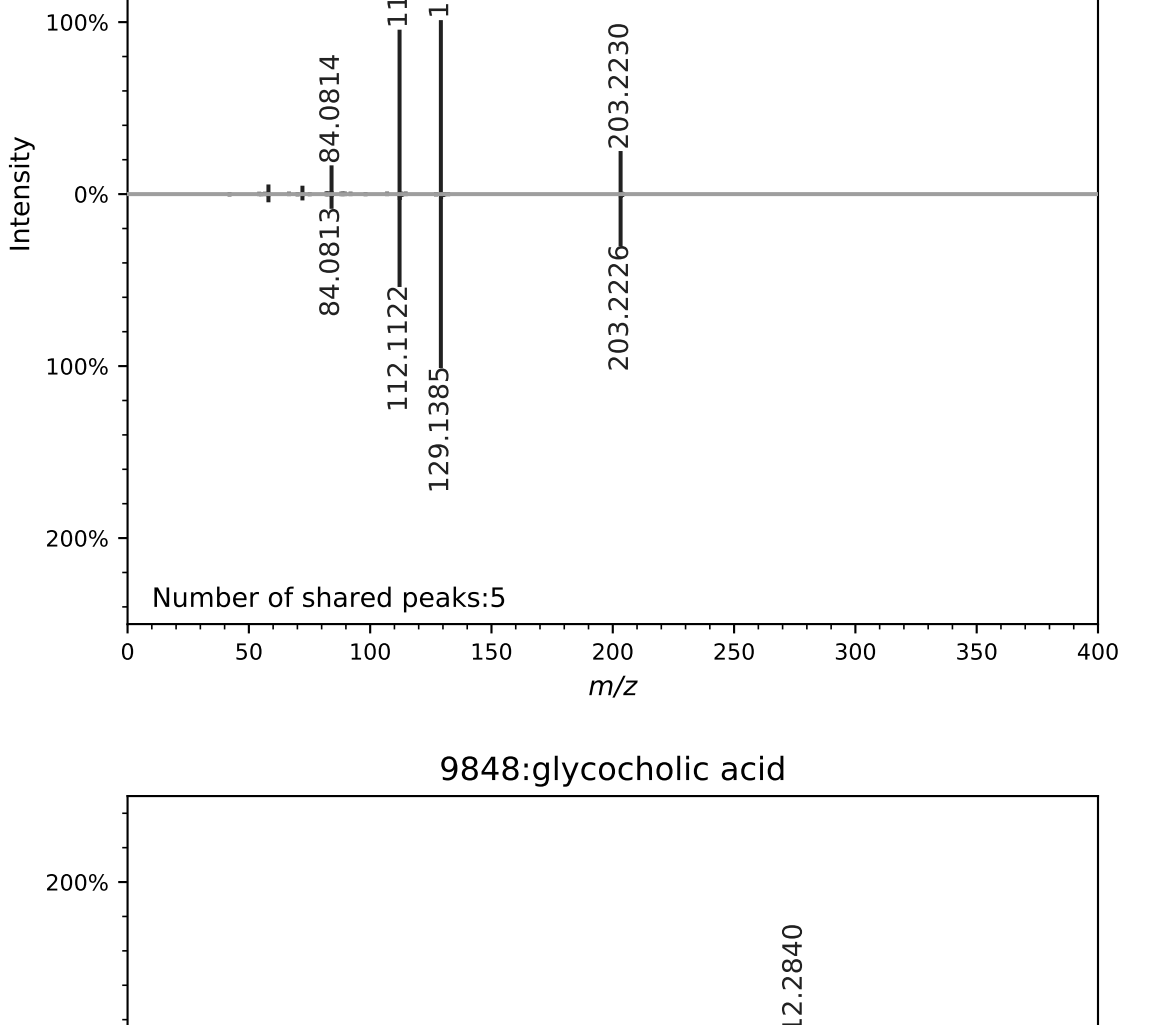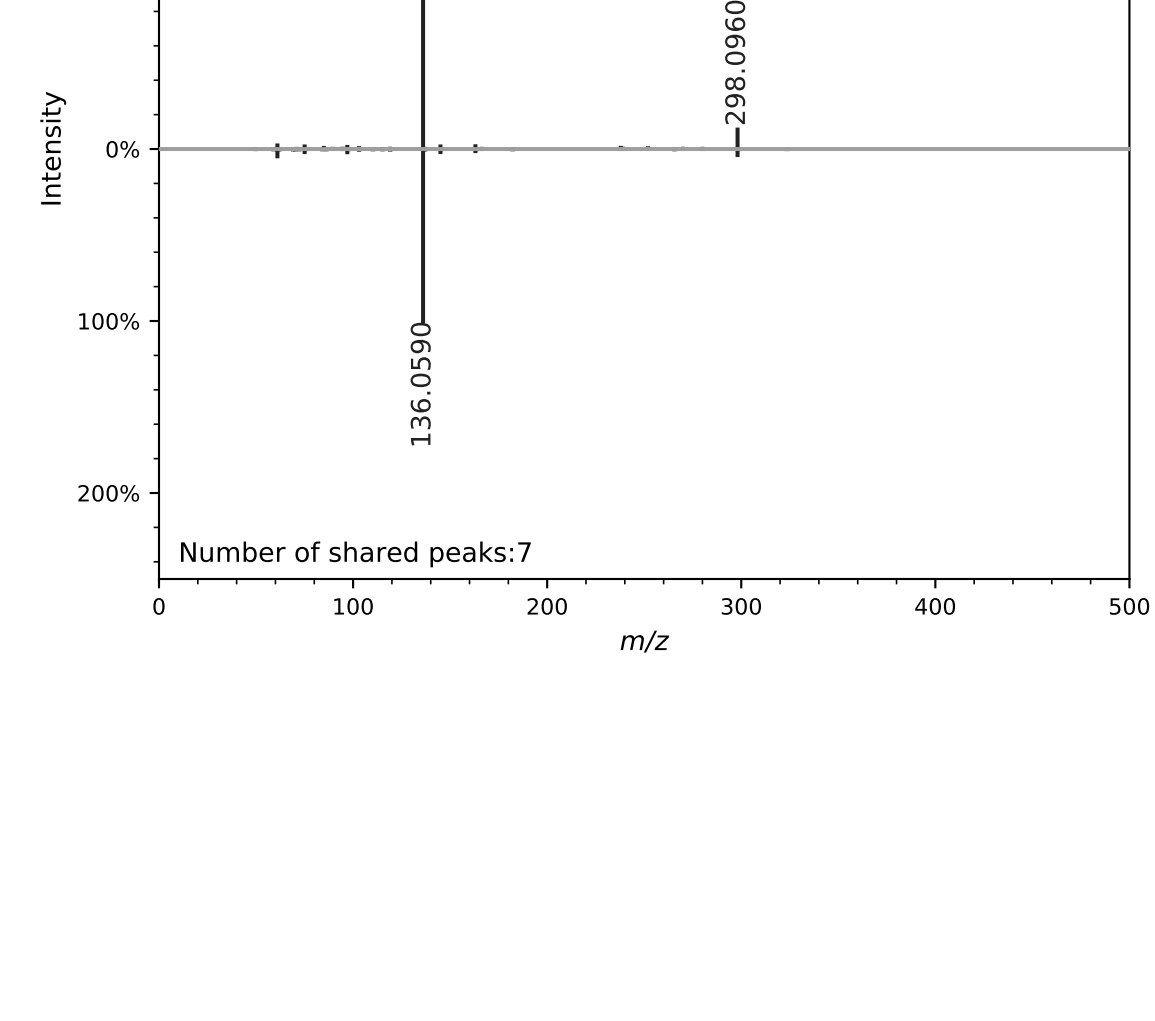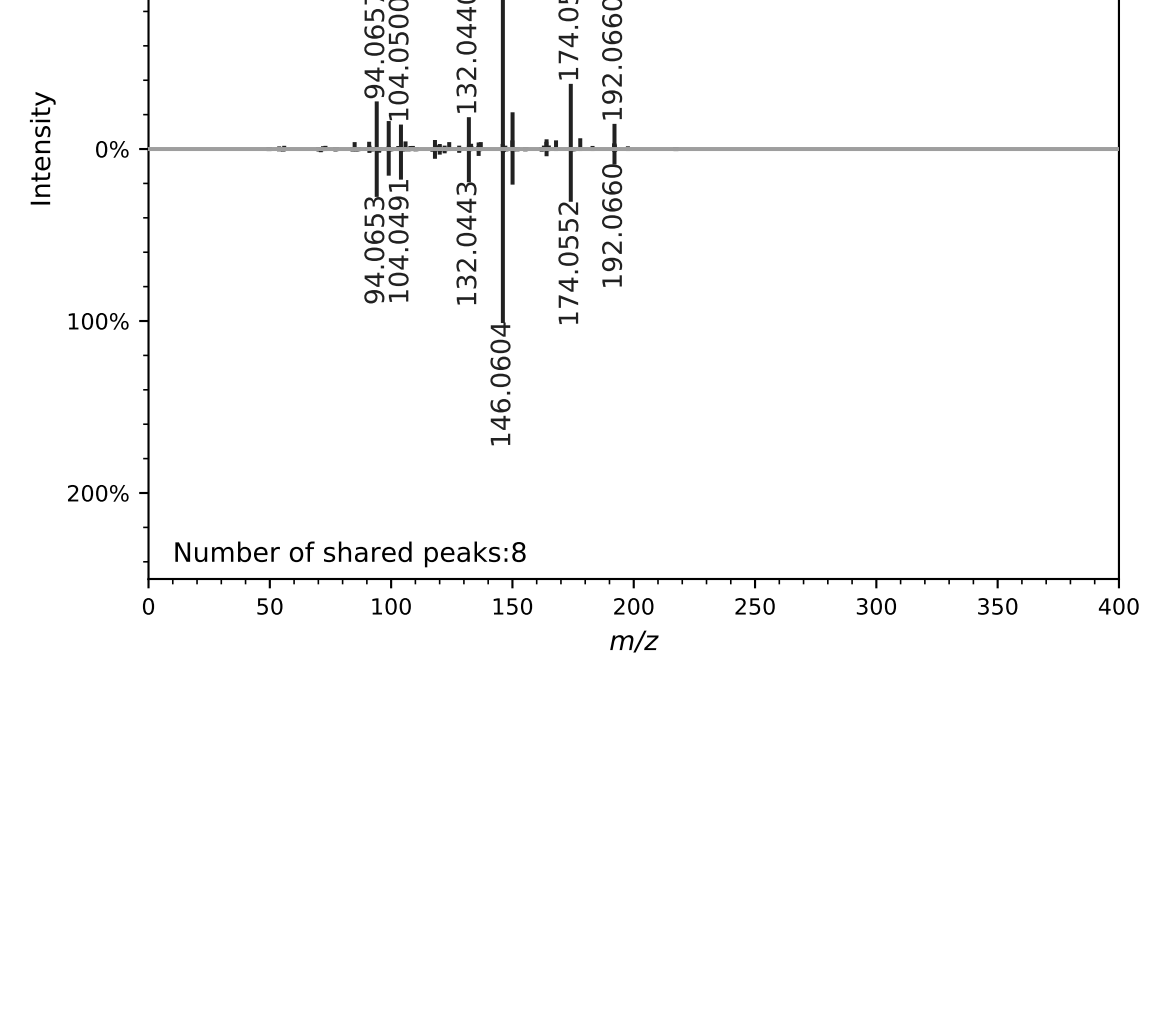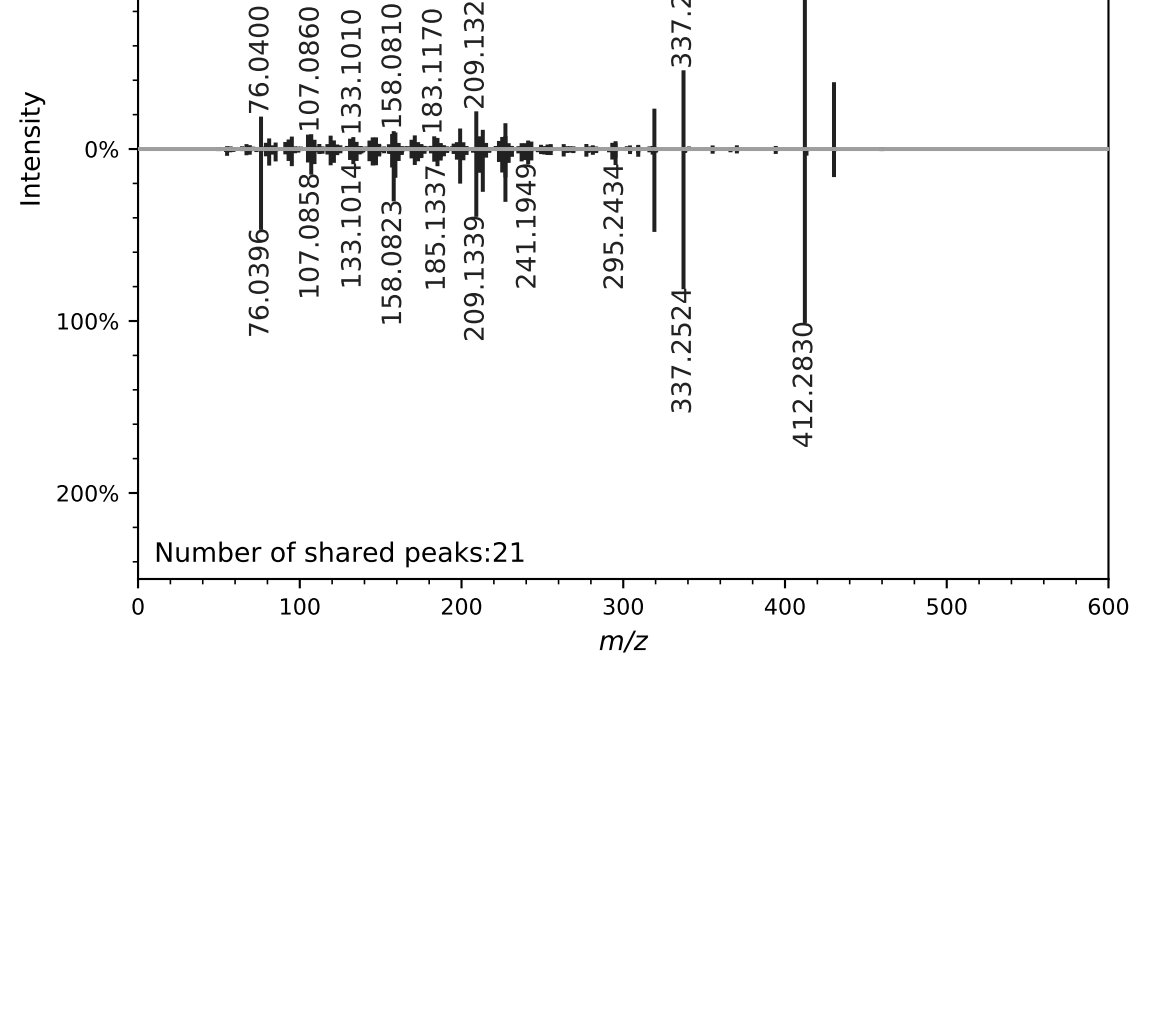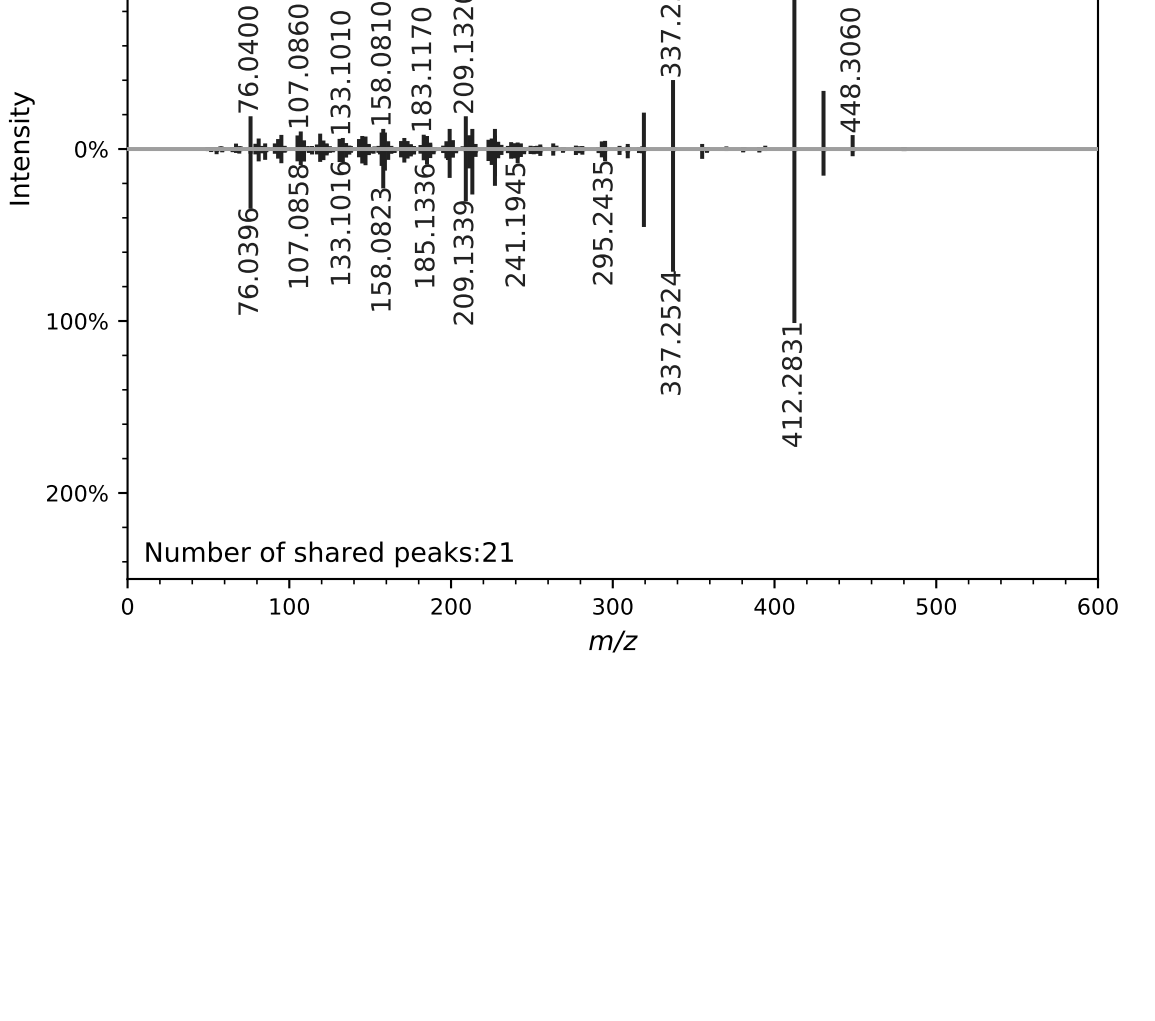

Supplement: Supplementary file [file 2020.03.27.20045534-3.pdf]
